# Supplementary material
Source: ML conference proceedings conference paper supplement (https://openreview.net/forum?id=ymJuBifPUy)

**CoGym (outcome rating)** **EvalGenProduct (grade)** **HelpSteer2 (helpfulness)**

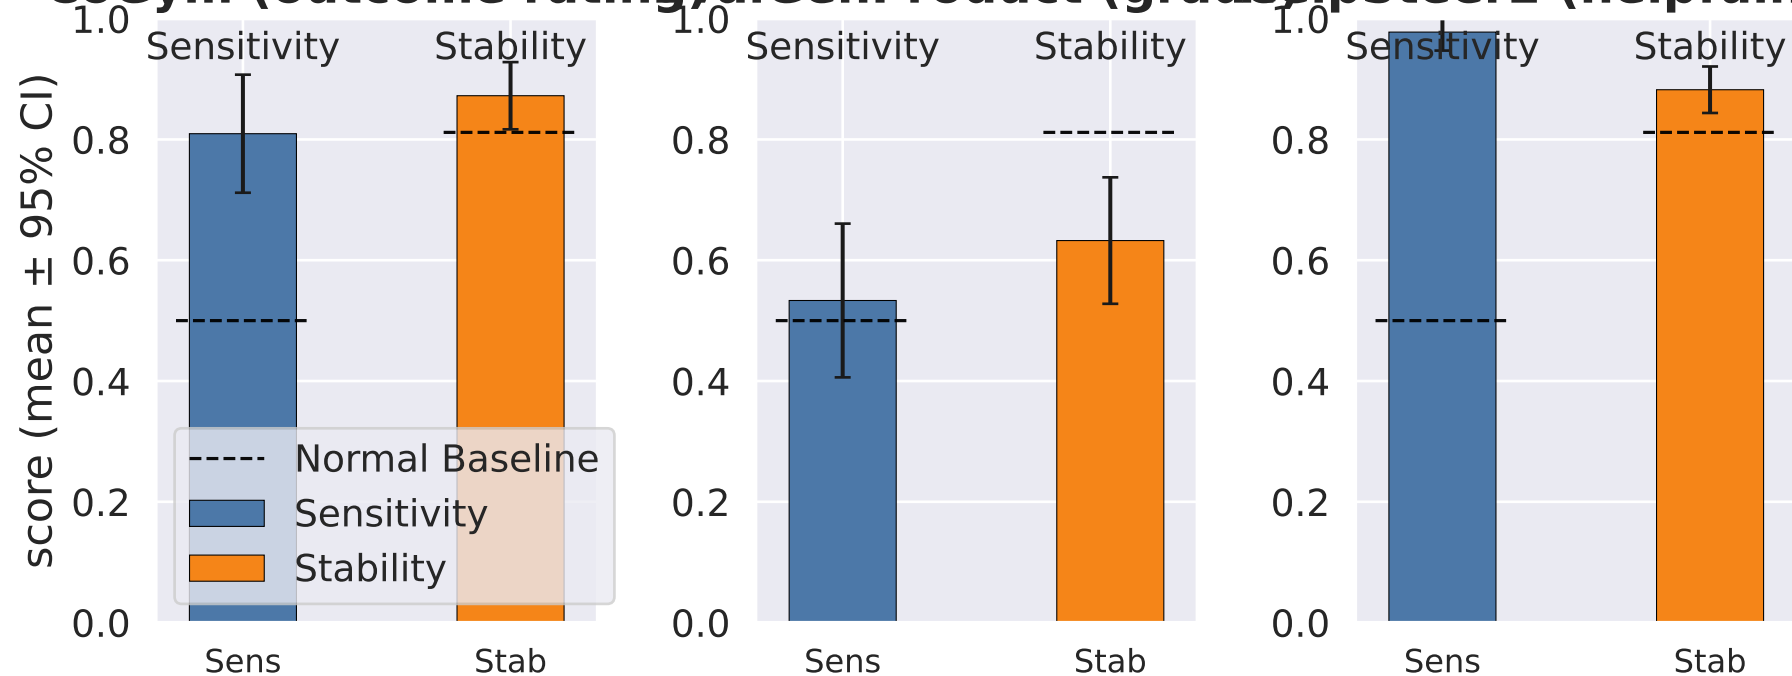

**Primock57 (time\_series)** **RealHumanEval (accepted)** **SimpEval (score)**

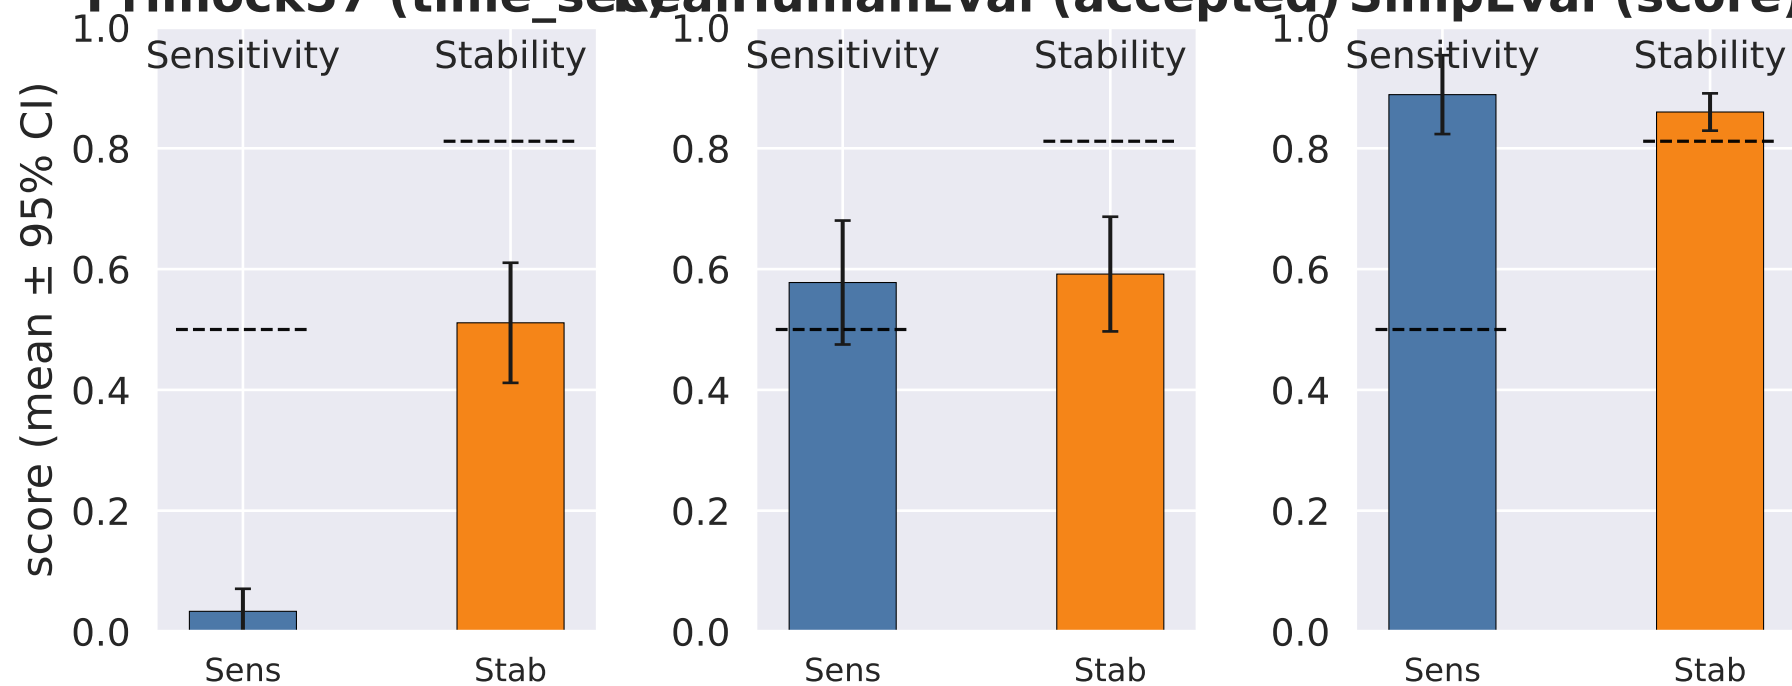

Supplement: supplementary_material [file robustness_bars_two_clusters_autometrics_only.pdf › iclr_autometrics/autometrics/analysis/robustness/outputs/robustness_bars_two_clusters_autometrics_only.pdf]
