# Supplementary material
Source: ML conference proceedings conference paper supplement (https://openreview.net/forum?id=ymJuBifPUy)

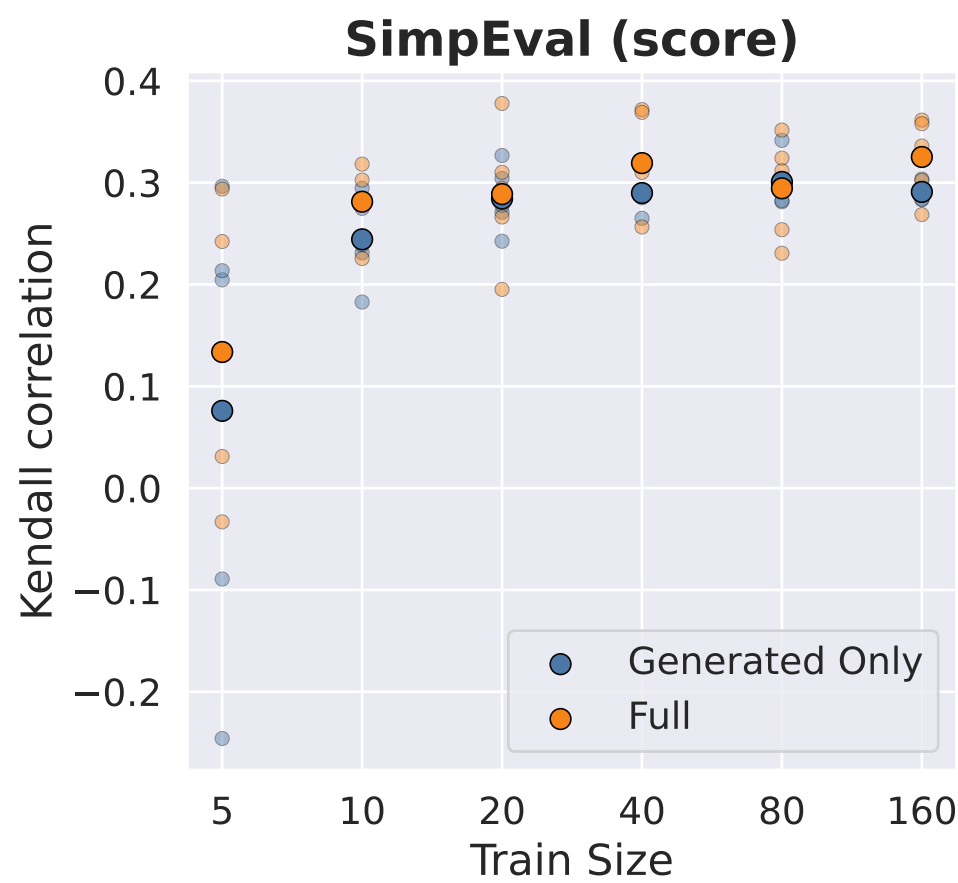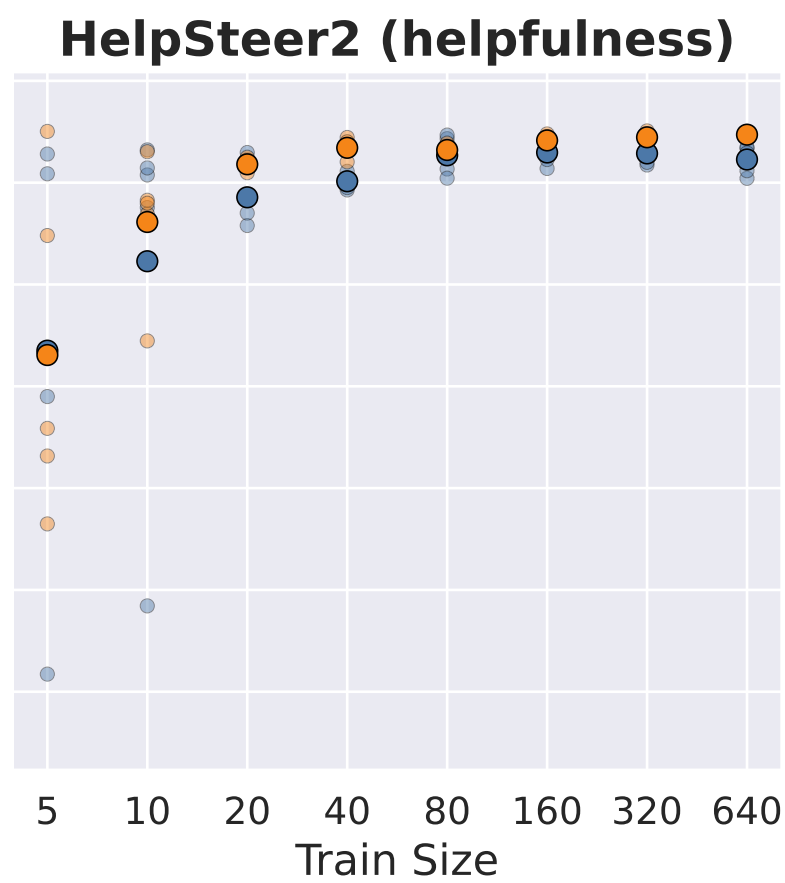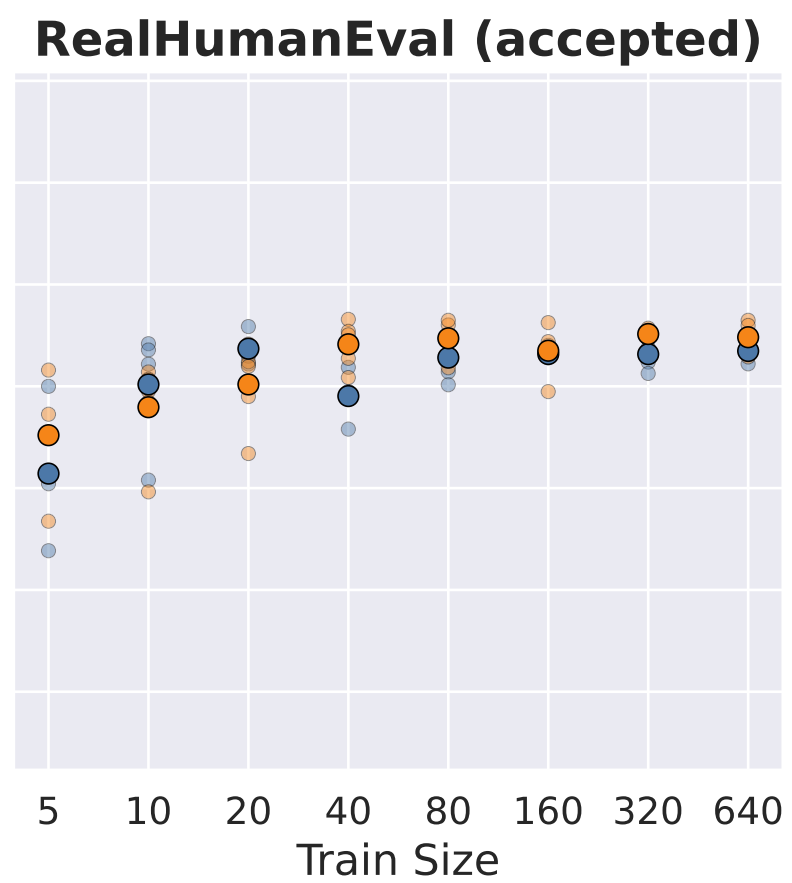

Supplement: supplementary_material [file data_scaling_scatter_kendall.pdf › iclr_autometrics/autometrics/analysis/data_scaling/outputs/data_scaling_scatter_kendall.pdf]

# Tau Bench, Qwen3 32B

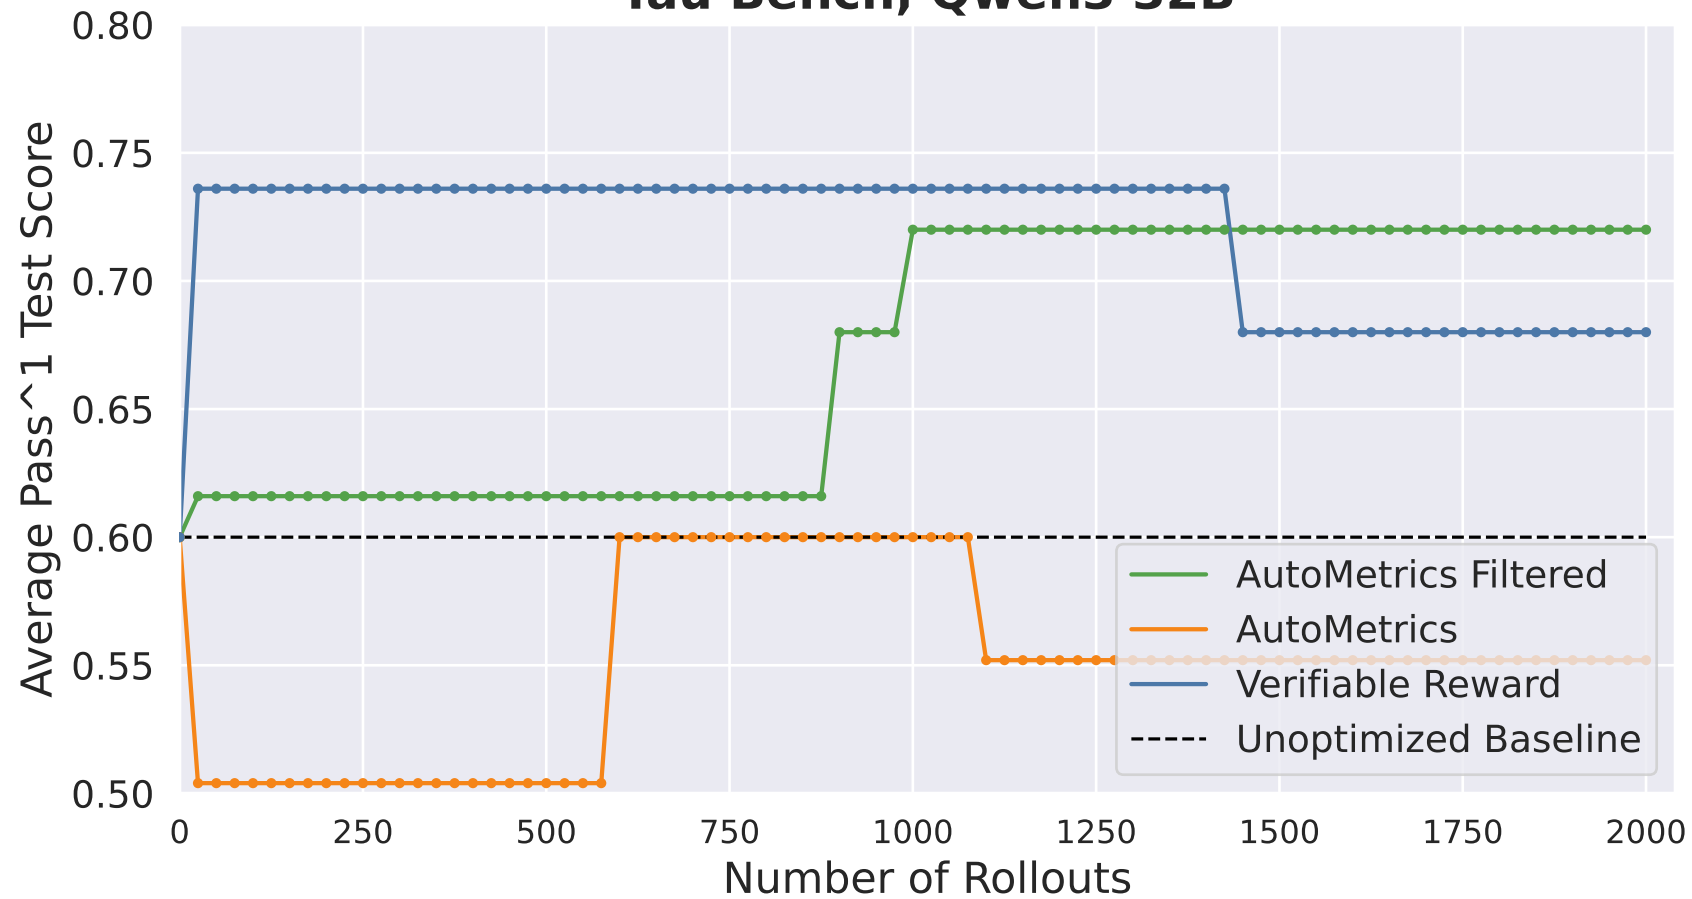

Supplement: supplementary_material [file gepa_rollout_line_plot.pdf › iclr_autometrics/autometrics/analysis/gepa/outputs/gepa_rollout_line_plot.pdf]

# Tau Bench, Qwen3 32B

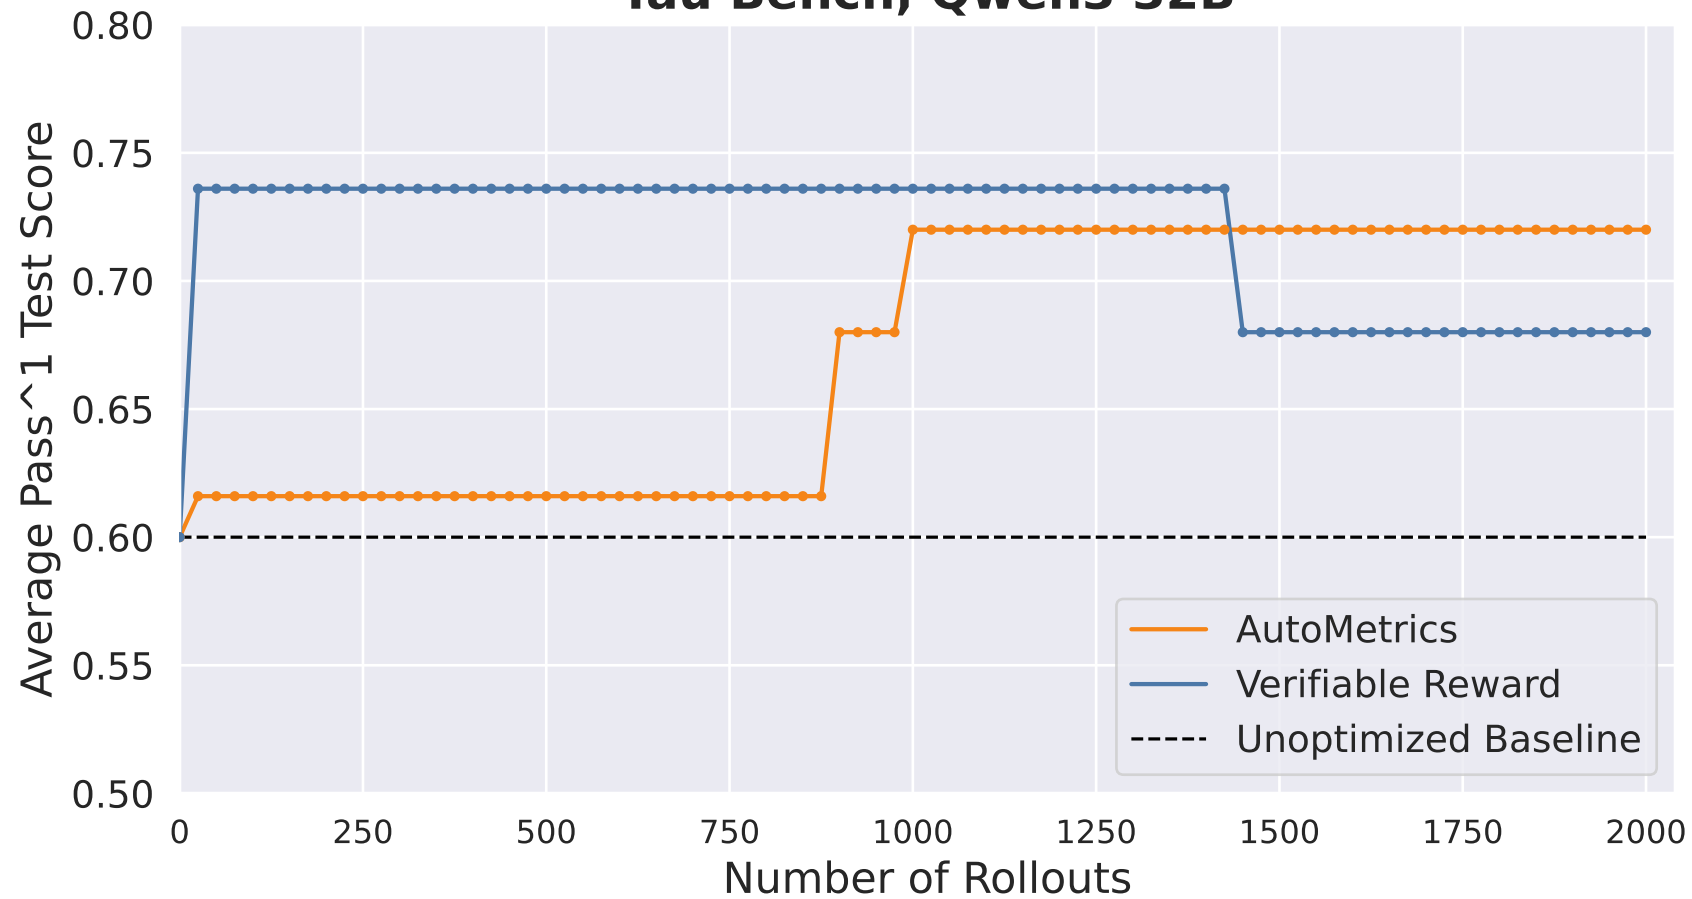

Supplement: supplementary_material [file gepa_rollout_line_plot_filtered_as_autometrics.pdf › iclr_autometrics/autometrics/analysis/gepa/outputs/gepa_rollout_line_plot_filtered_as_autometrics.pdf]

# Tau Bench, Qwen3 32B

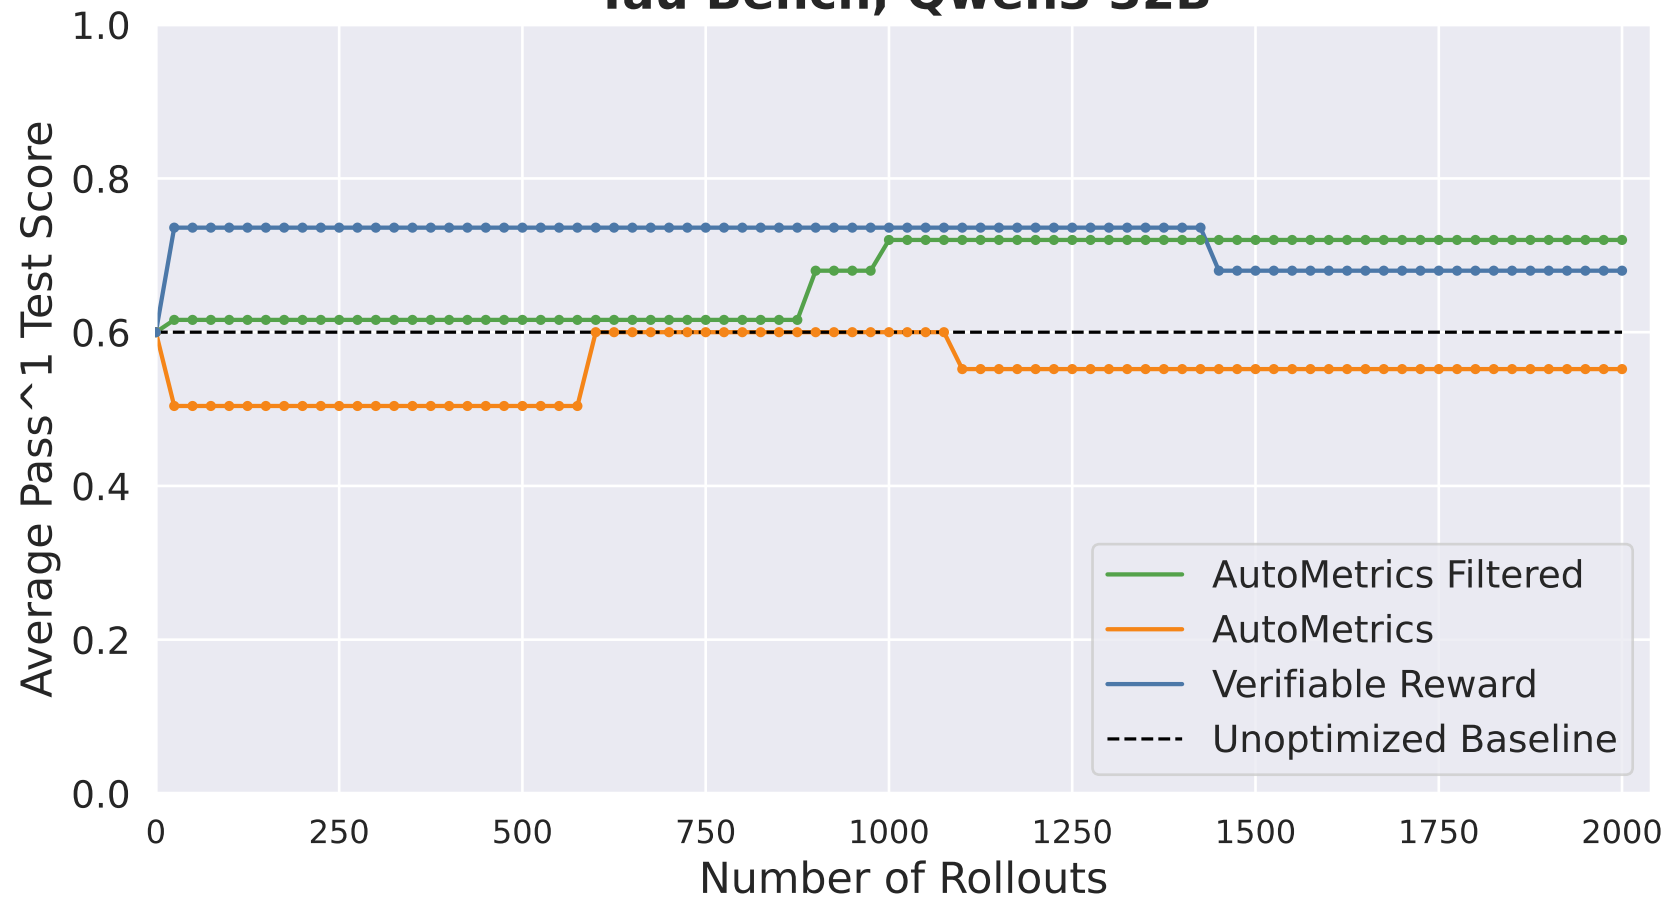

Supplement: supplementary_material [file gepa_rollout_line_plot_old.pdf › iclr_autometrics/autometrics/analysis/gepa/outputs/gepa_rollout_line_plot_old.pdf]

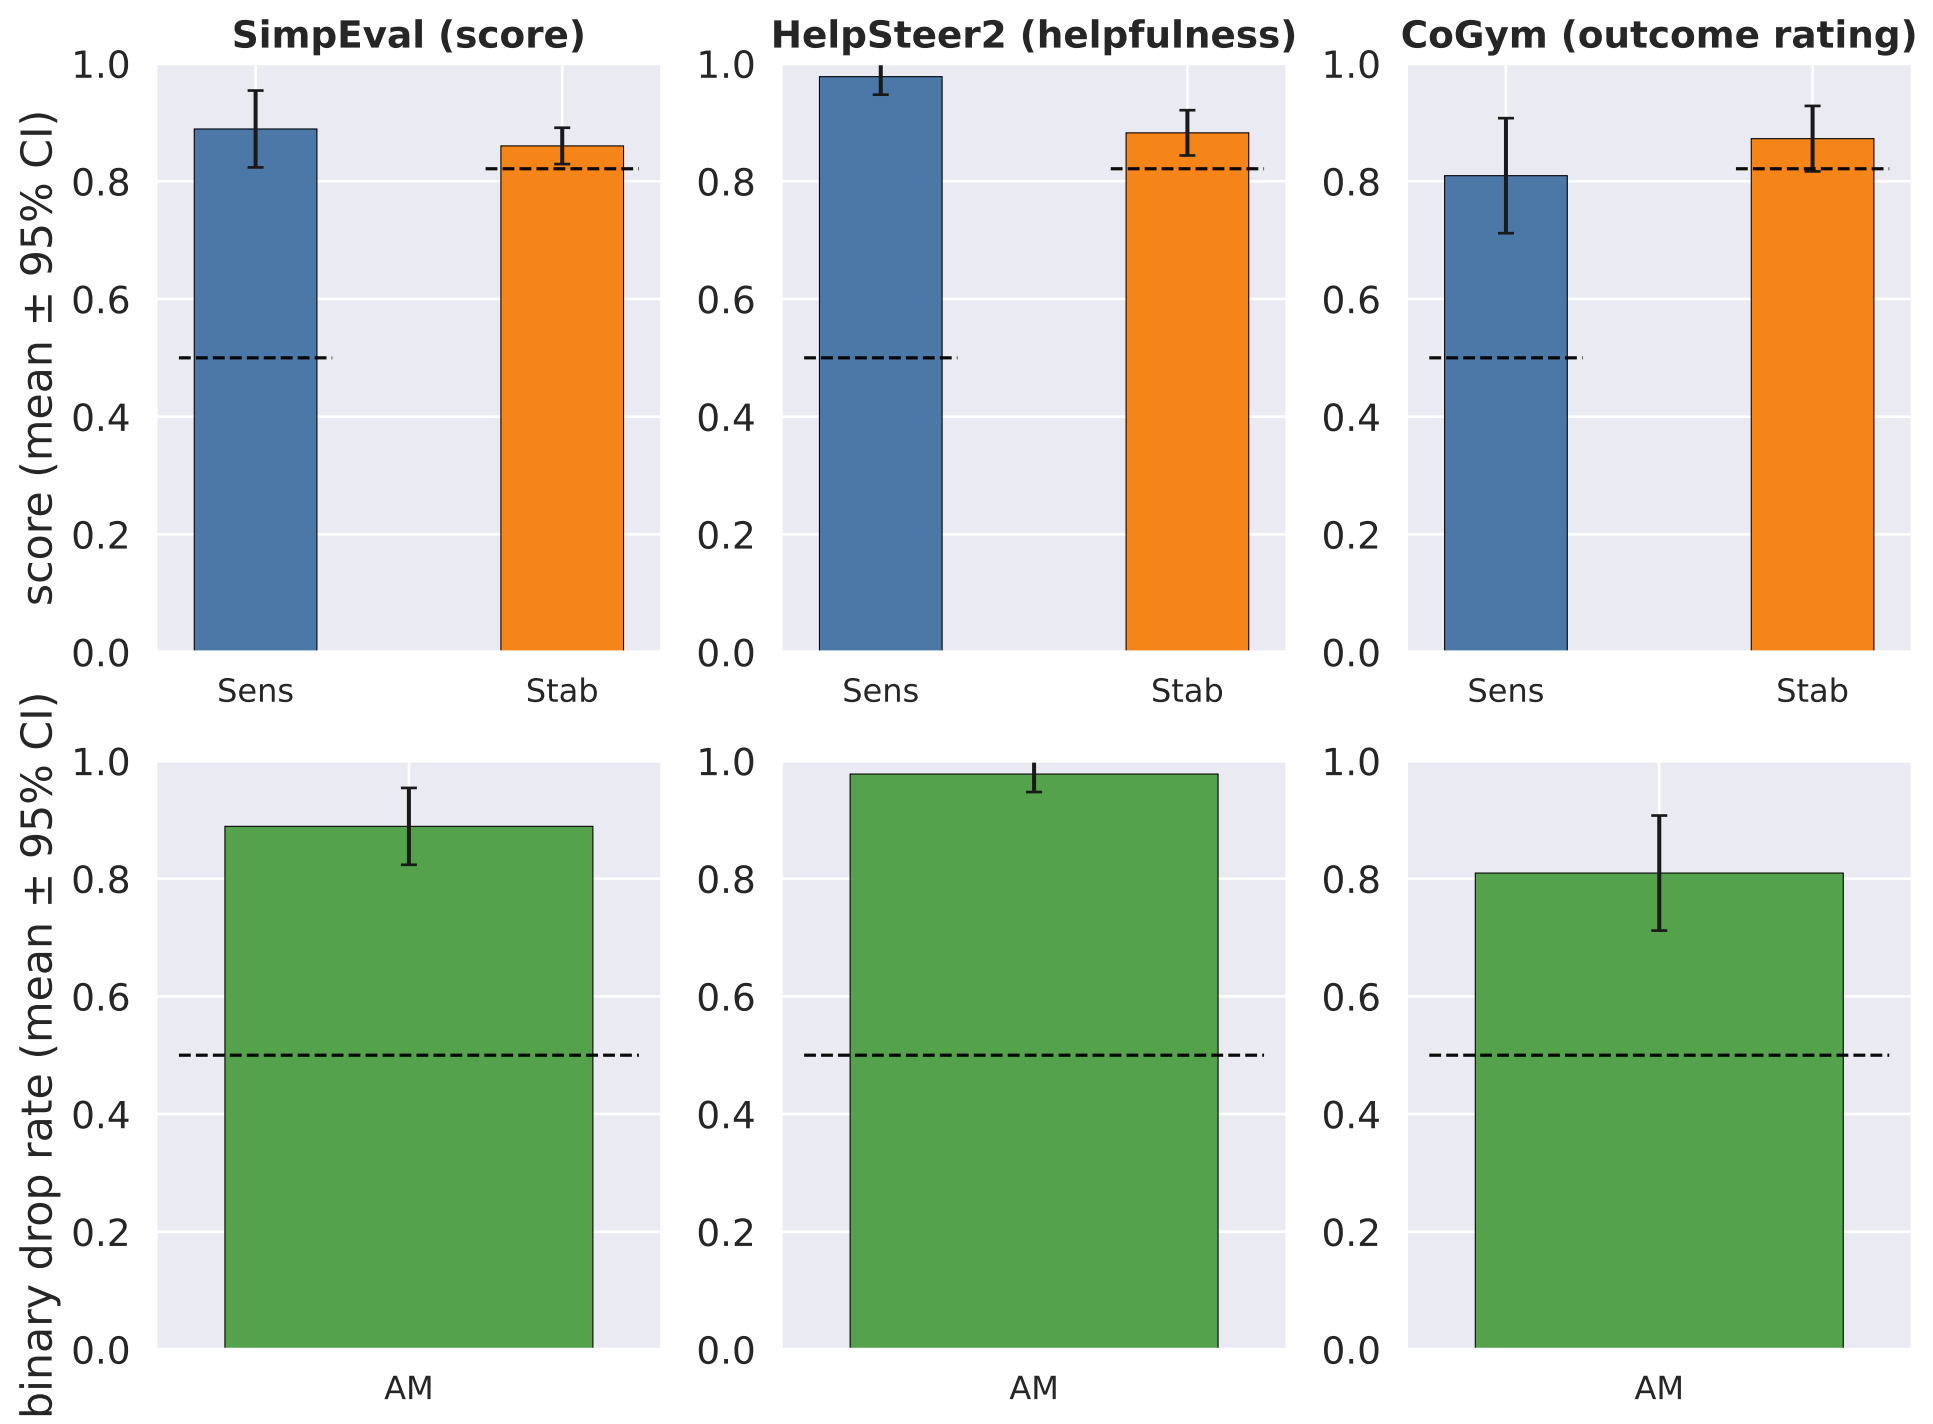

Supplement: supplementary_material [file autometrics_core3_combined.pdf › iclr_autometrics/autometrics/analysis/robustness/outputs/autometrics_core3_combined.pdf]

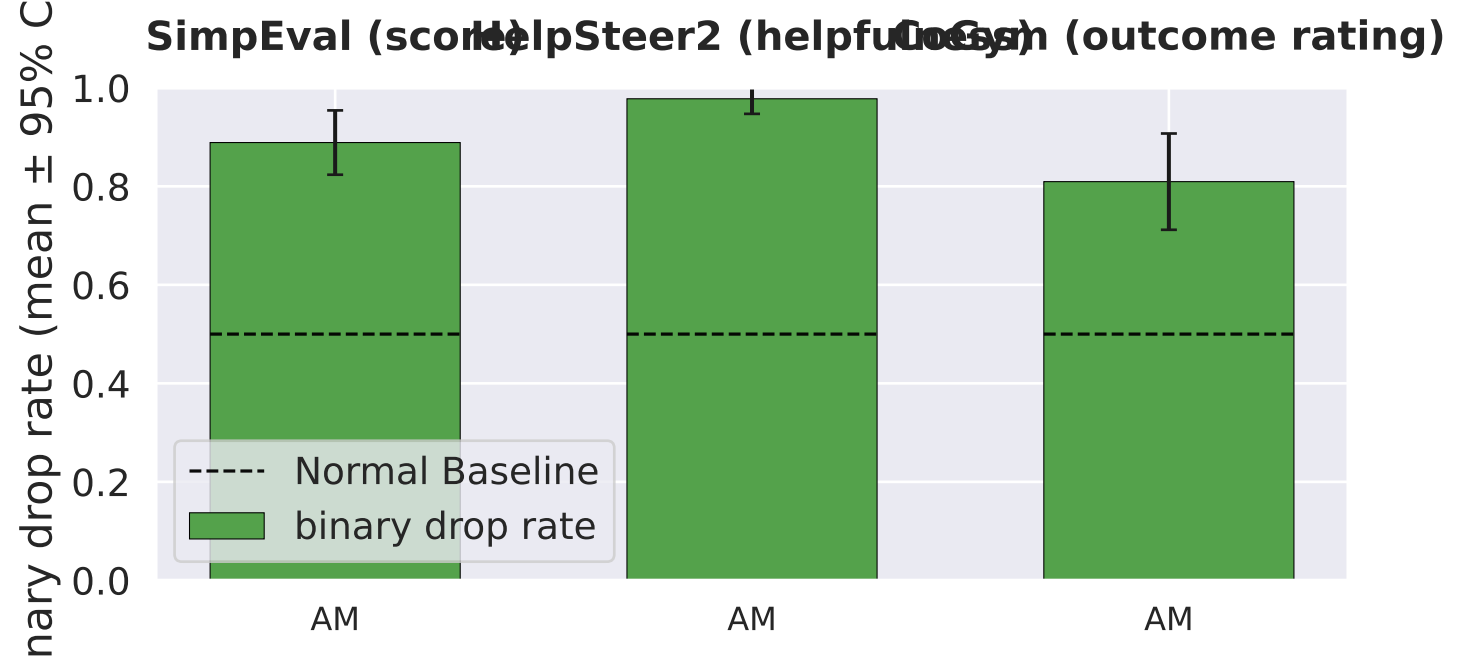

Supplement: supplementary_material [file autometrics_core3_single_axis_binary.pdf › iclr_autometrics/autometrics/analysis/robustness/outputs/autometrics_core3_single_axis_binary.pdf]

## SimpEval

(score)

## HelpSteer2

(helpfulness)

## CoGym

(outcome rating)

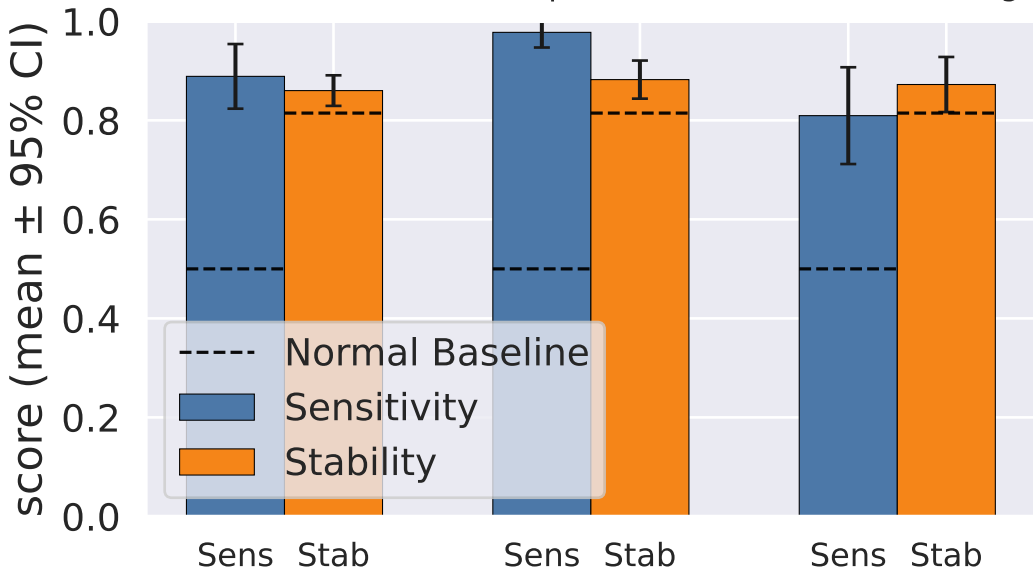

Supplement: supplementary_material [file autometrics_core3_single_axis_sens_stab.pdf › iclr_autometrics/autometrics/analysis/robustness/outputs/autometrics_core3_single_axis_sens_stab.pdf]

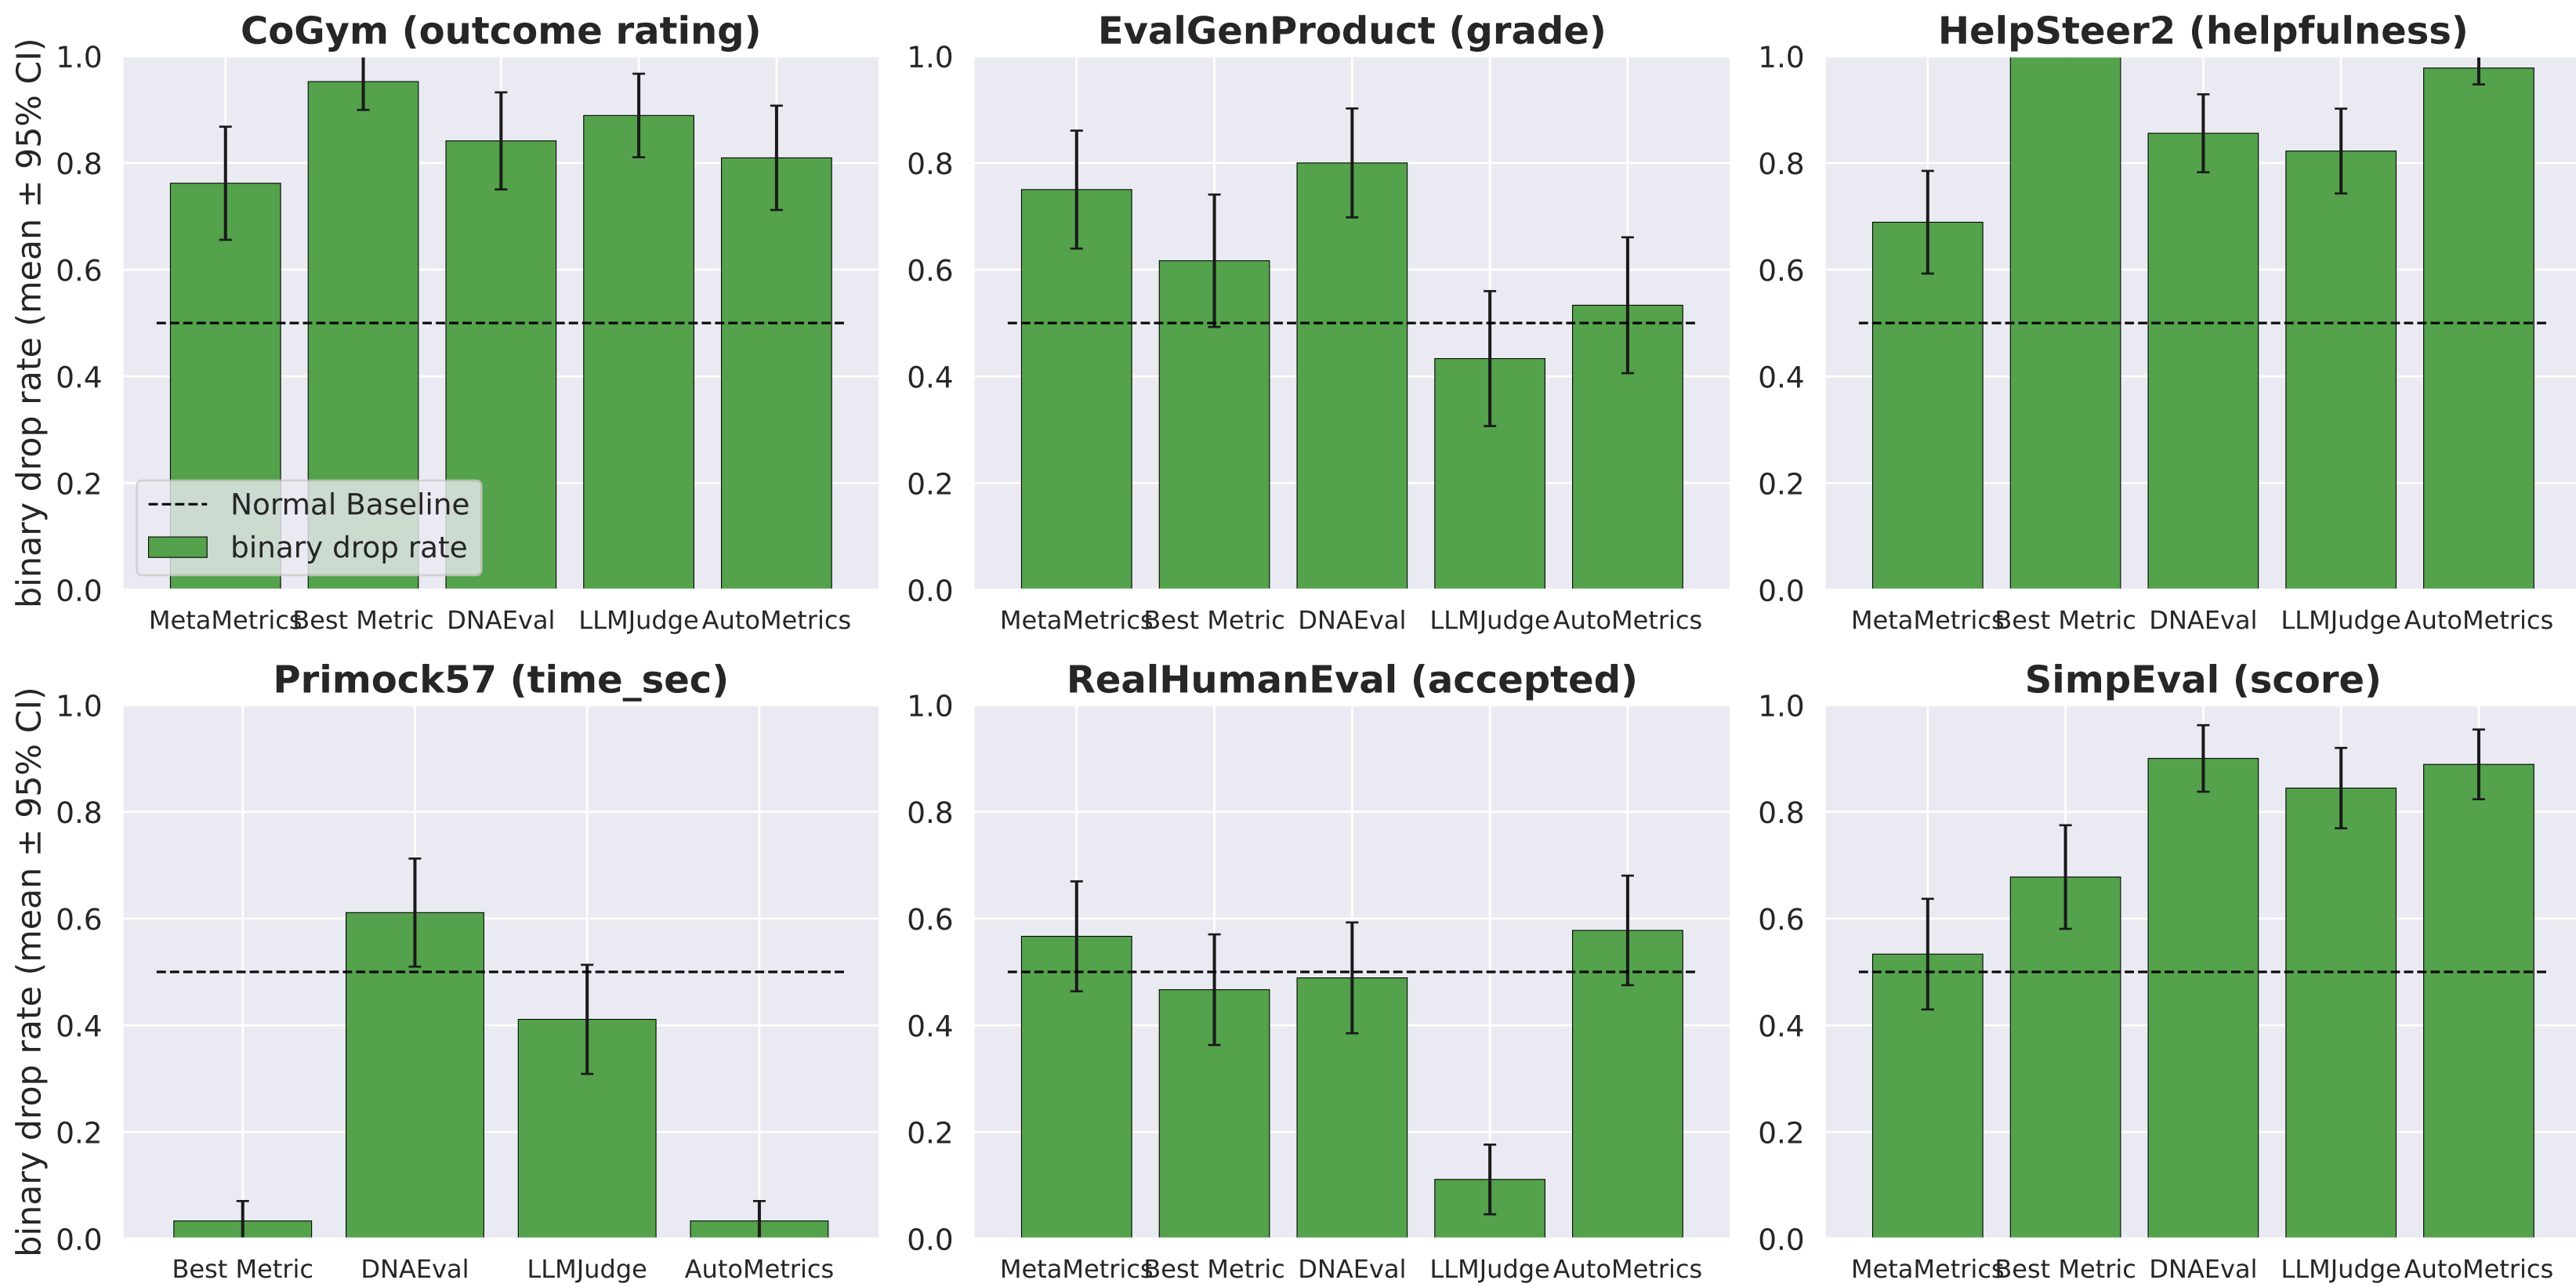

Supplement: supplementary_material [file binary_robustness_bars.pdf › iclr_autometrics/autometrics/analysis/robustness/outputs/binary_robustness_bars.pdf]

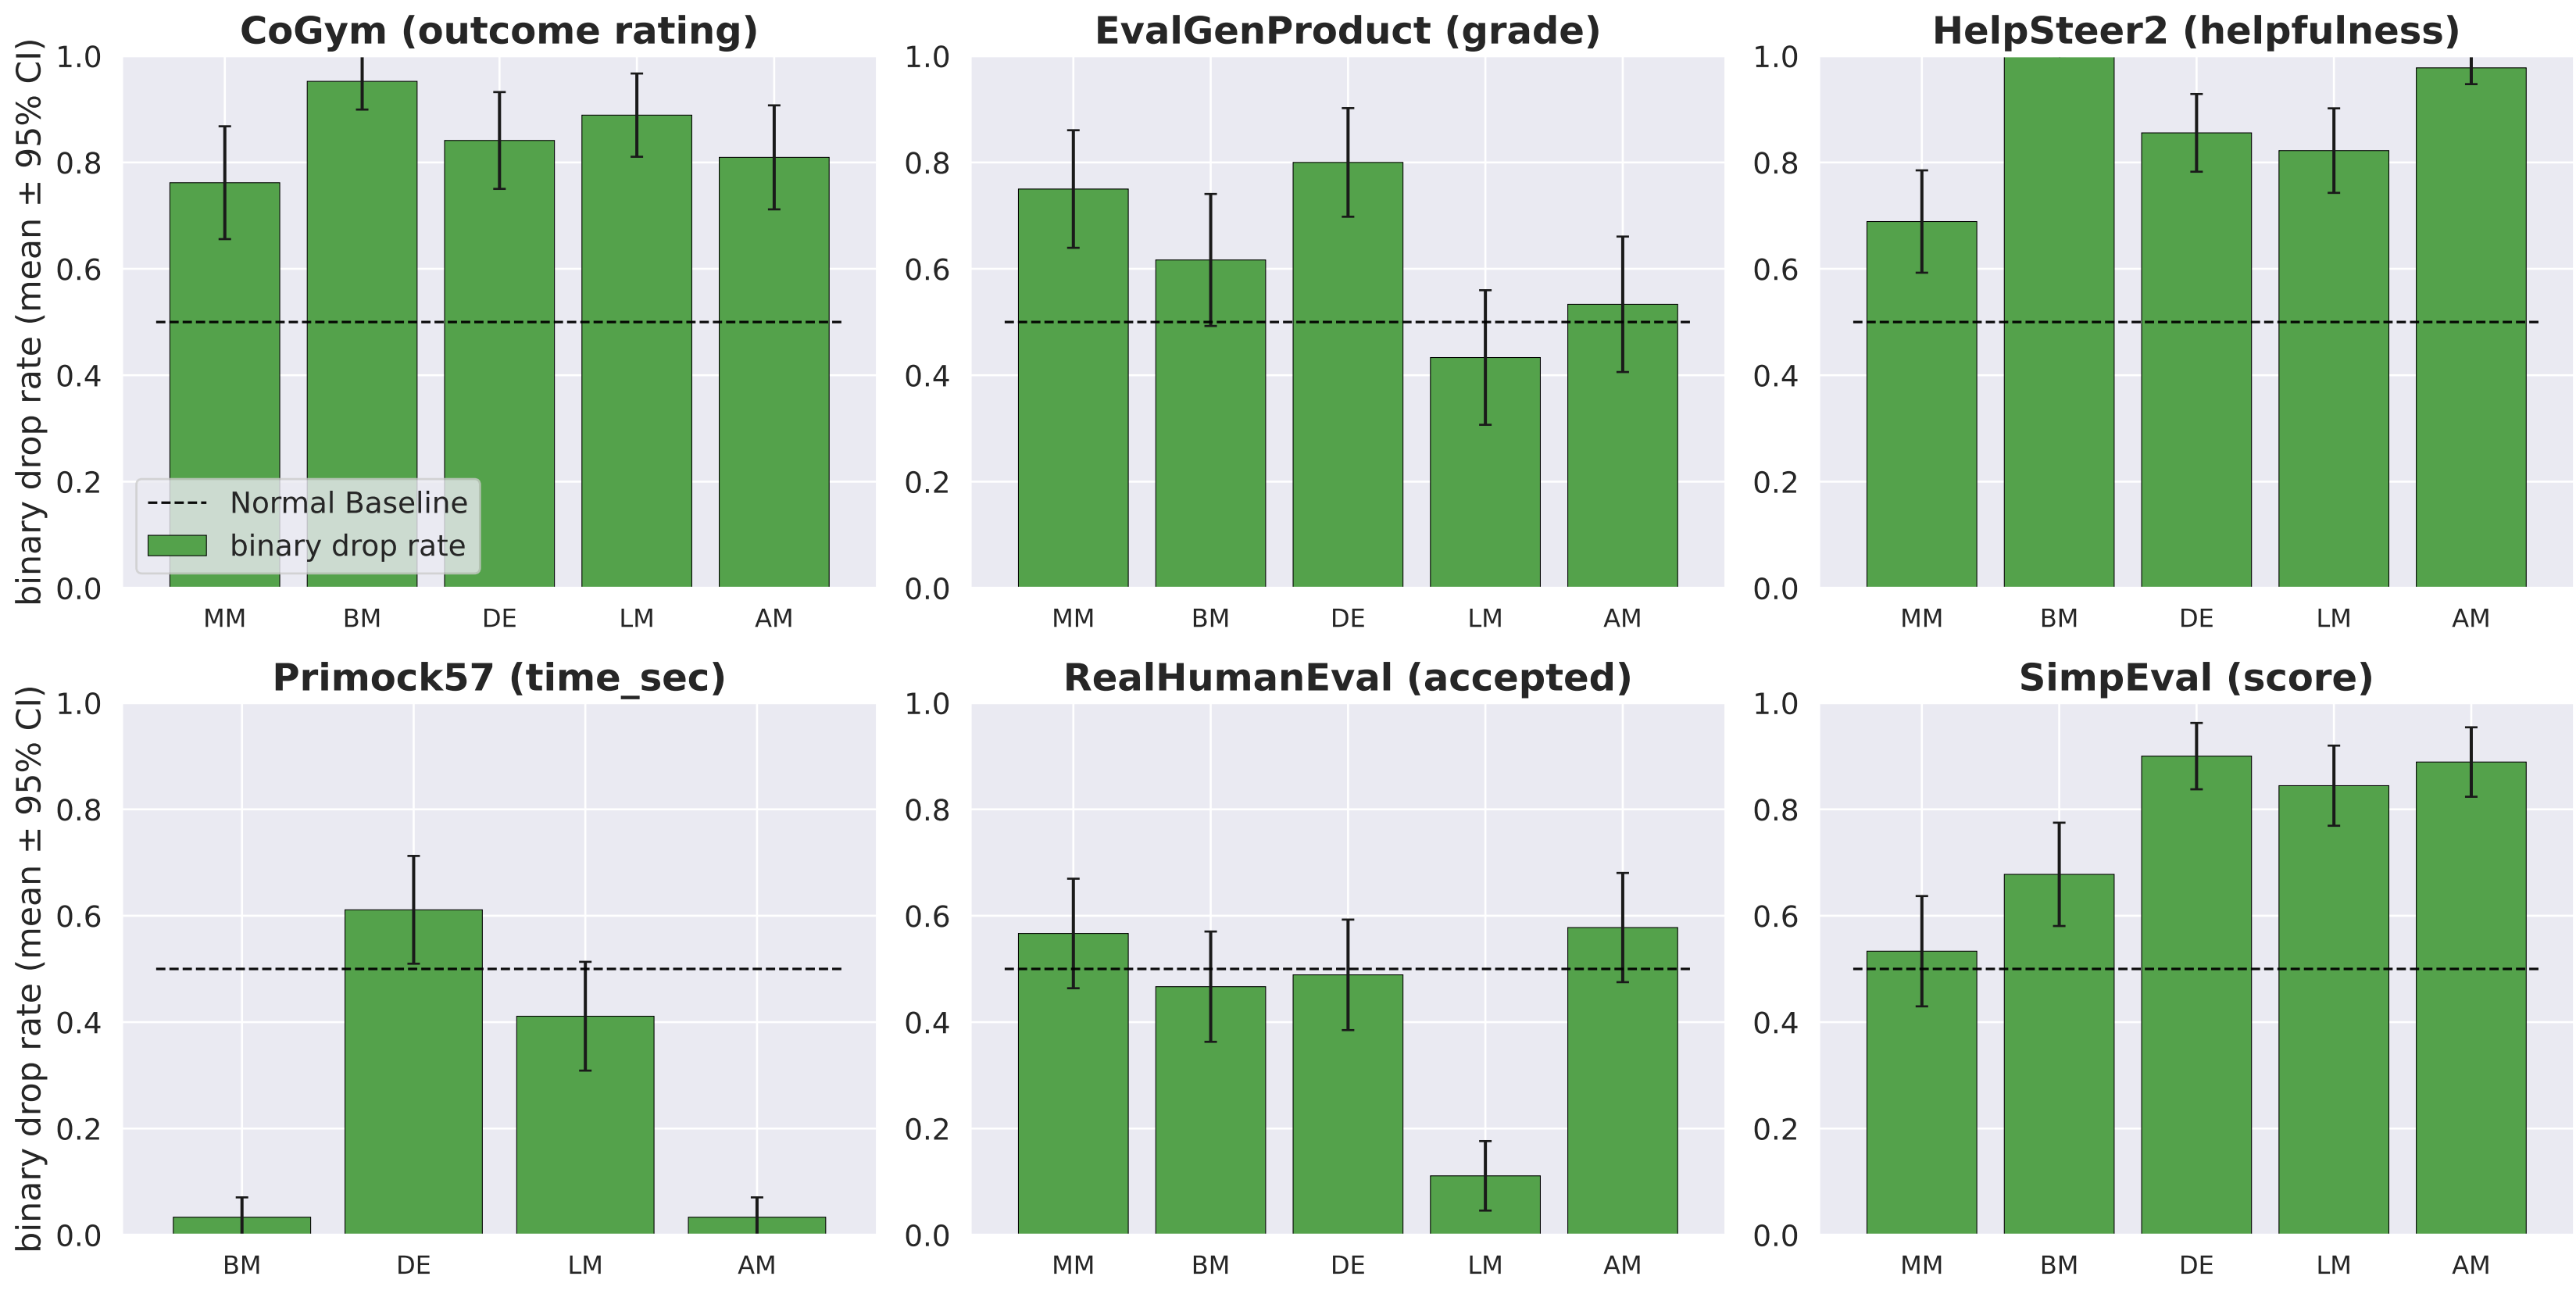

Supplement: supplementary_material [file binary_robustness_bars_abbrev.pdf › iclr_autometrics/autometrics/analysis/robustness/outputs/binary_robustness_bars_abbrev.pdf]

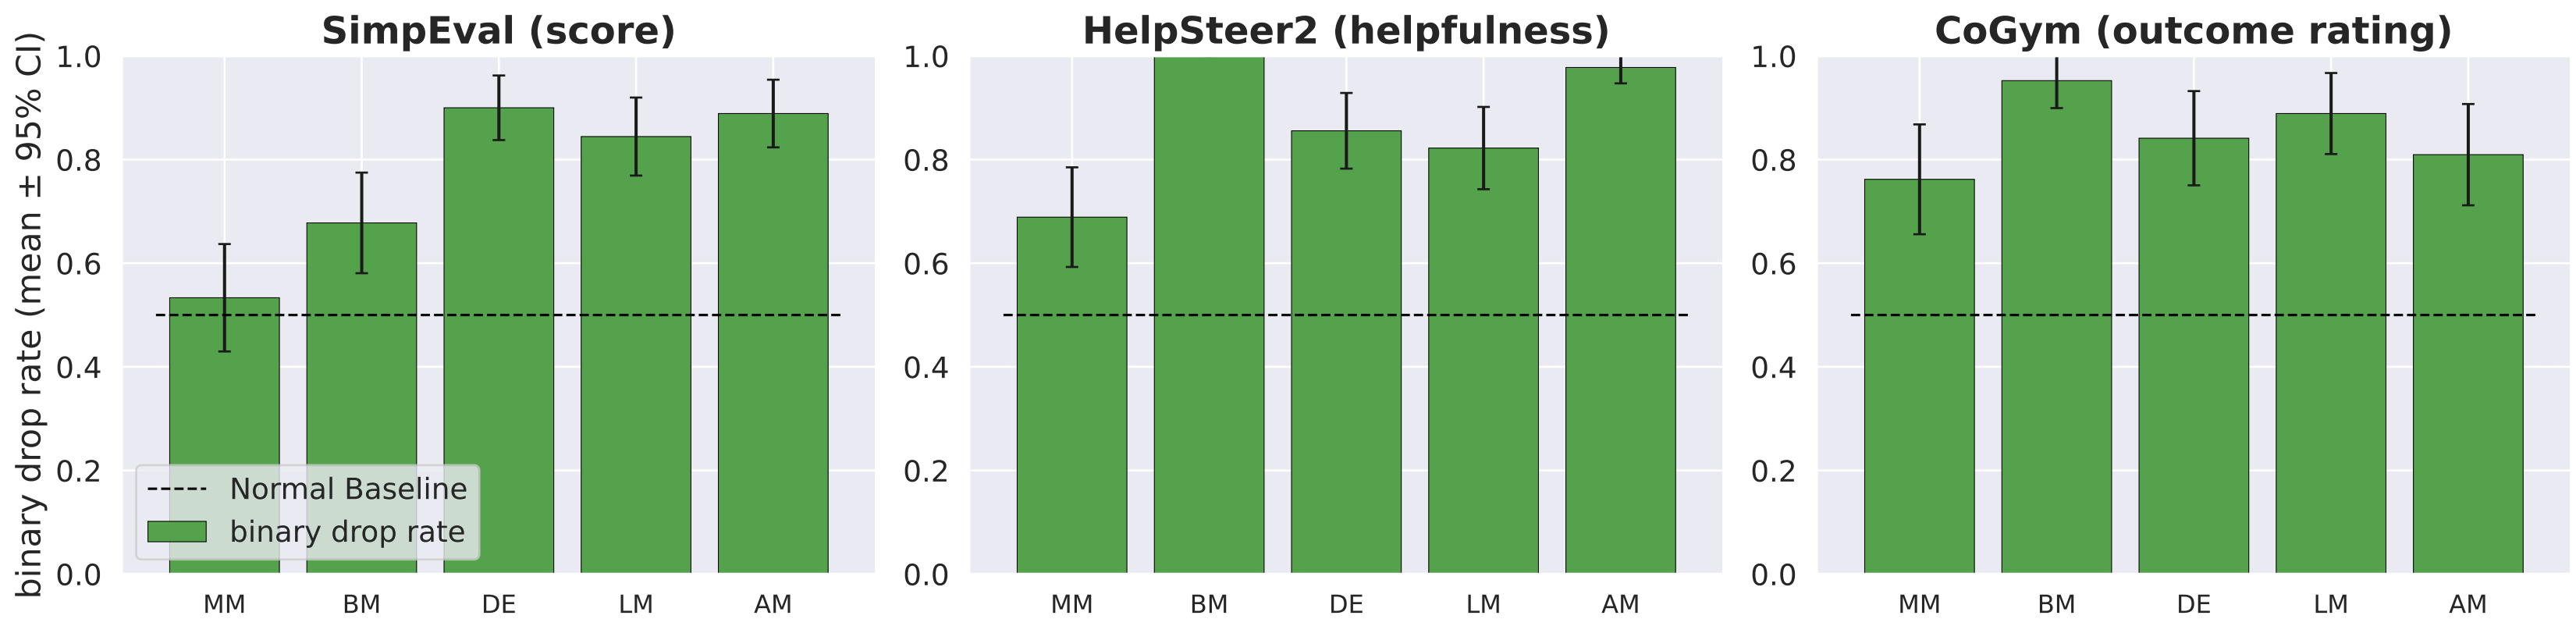

Supplement: supplementary_material [file binary_robustness_bars_abbrev_core3.pdf › iclr_autometrics/autometrics/analysis/robustness/outputs/binary_robustness_bars_abbrev_core3.pdf]

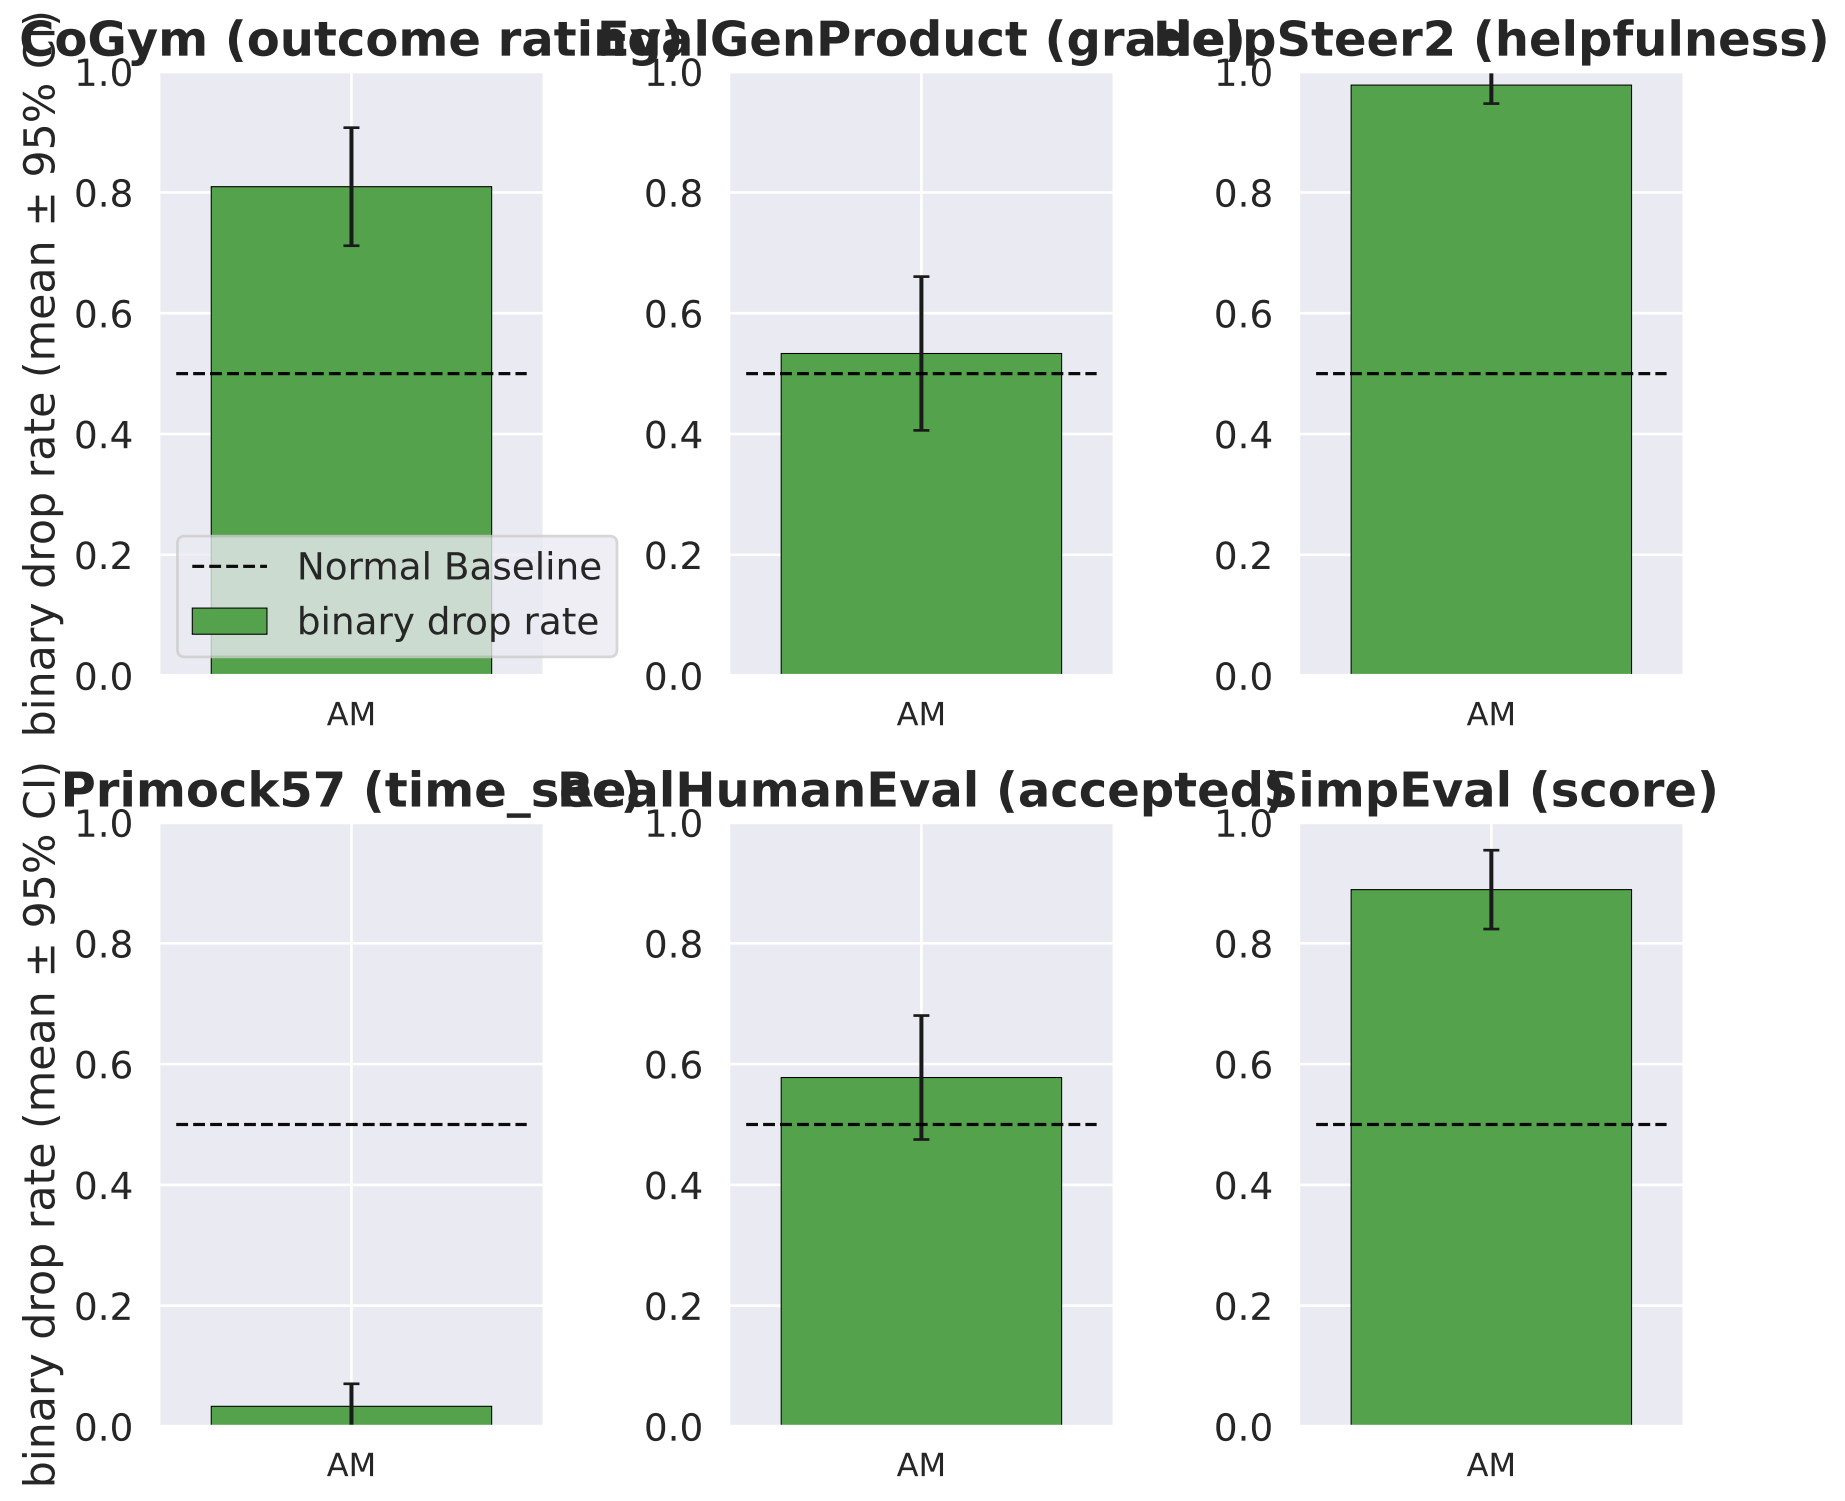

Supplement: supplementary_material [file binary_robustness_bars_autometrics_only.pdf › iclr_autometrics/autometrics/analysis/robustness/outputs/binary_robustness_bars_autometrics_only.pdf]

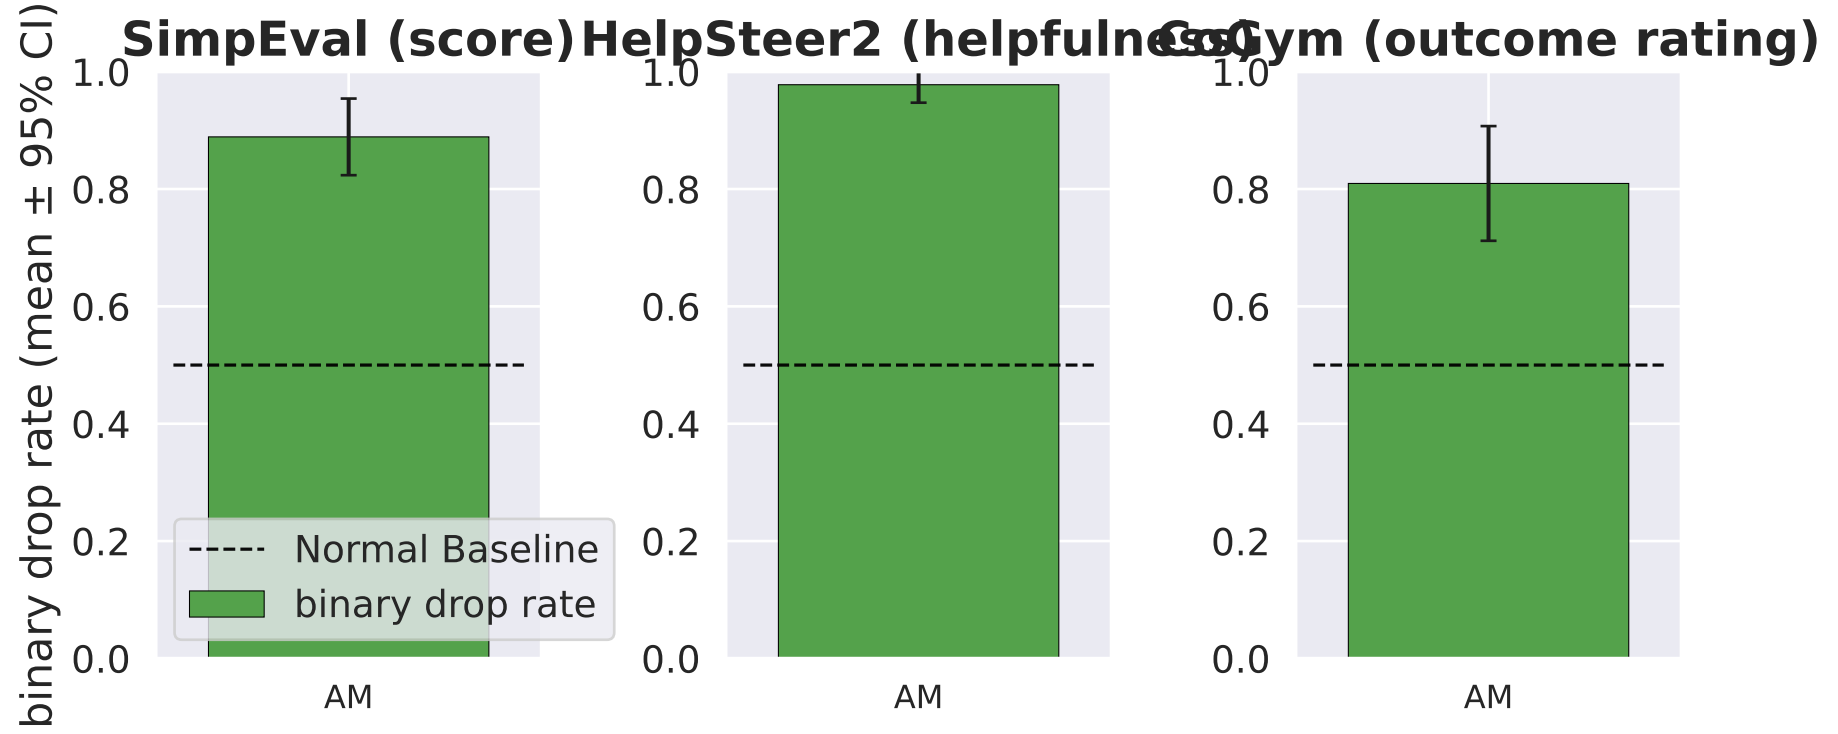

Supplement: supplementary_material [file binary_robustness_bars_autometrics_only_core3.pdf › iclr_autometrics/autometrics/analysis/robustness/outputs/binary_robustness_bars_autometrics_only_core3.pdf]

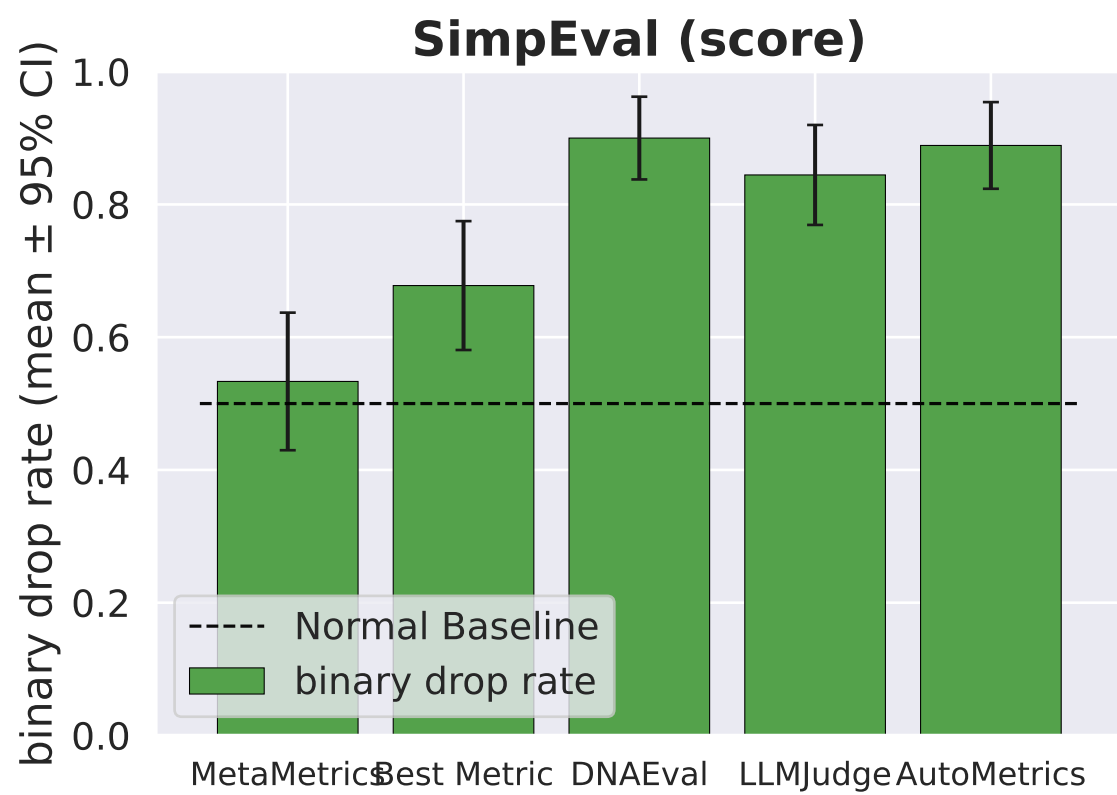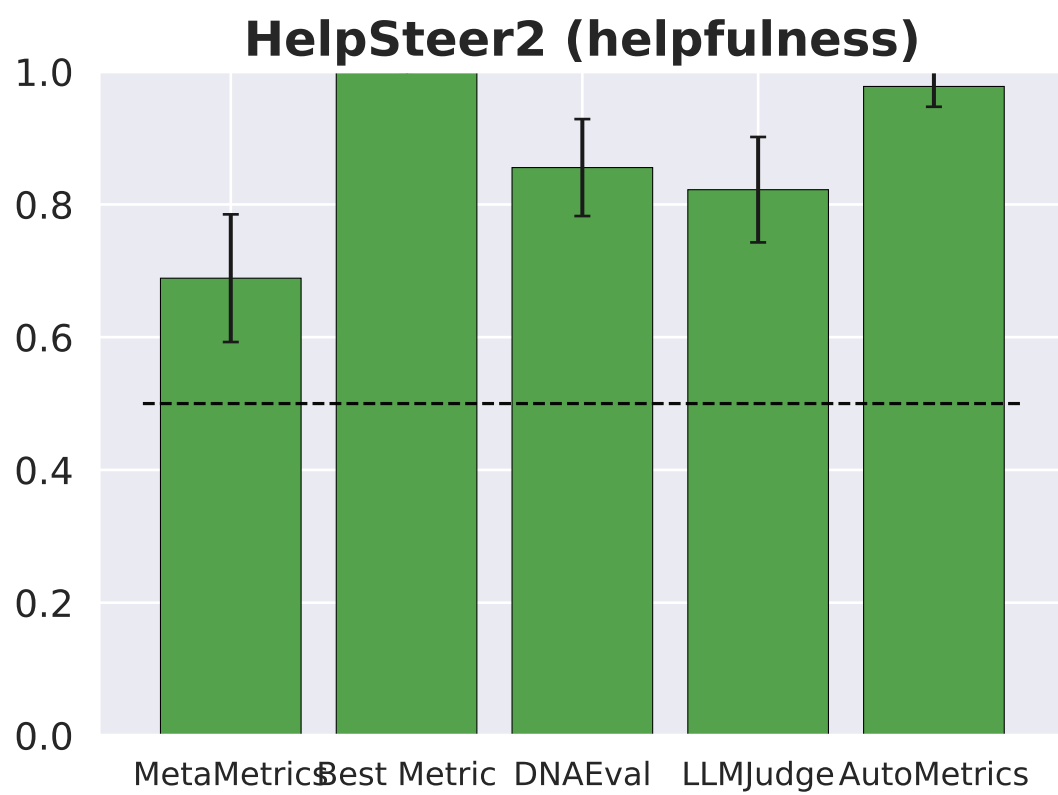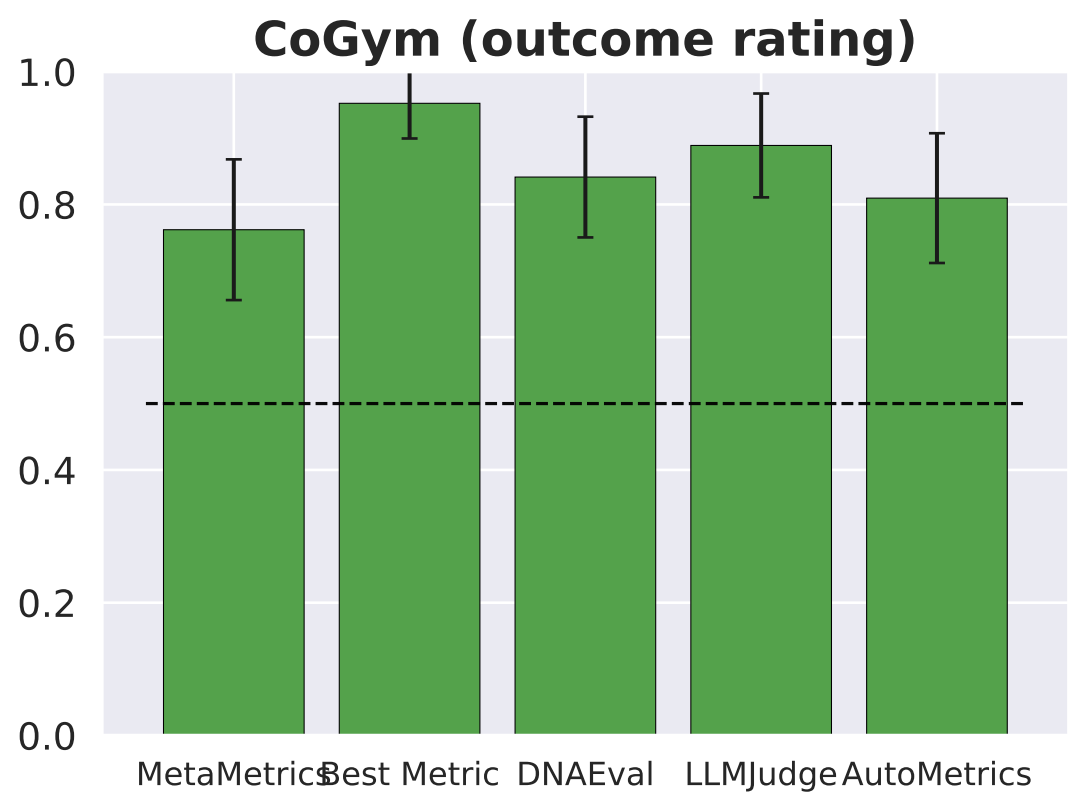

Supplement: supplementary_material [file binary_robustness_bars_core3.pdf › iclr_autometrics/autometrics/analysis/robustness/outputs/binary_robustness_bars_core3.pdf]

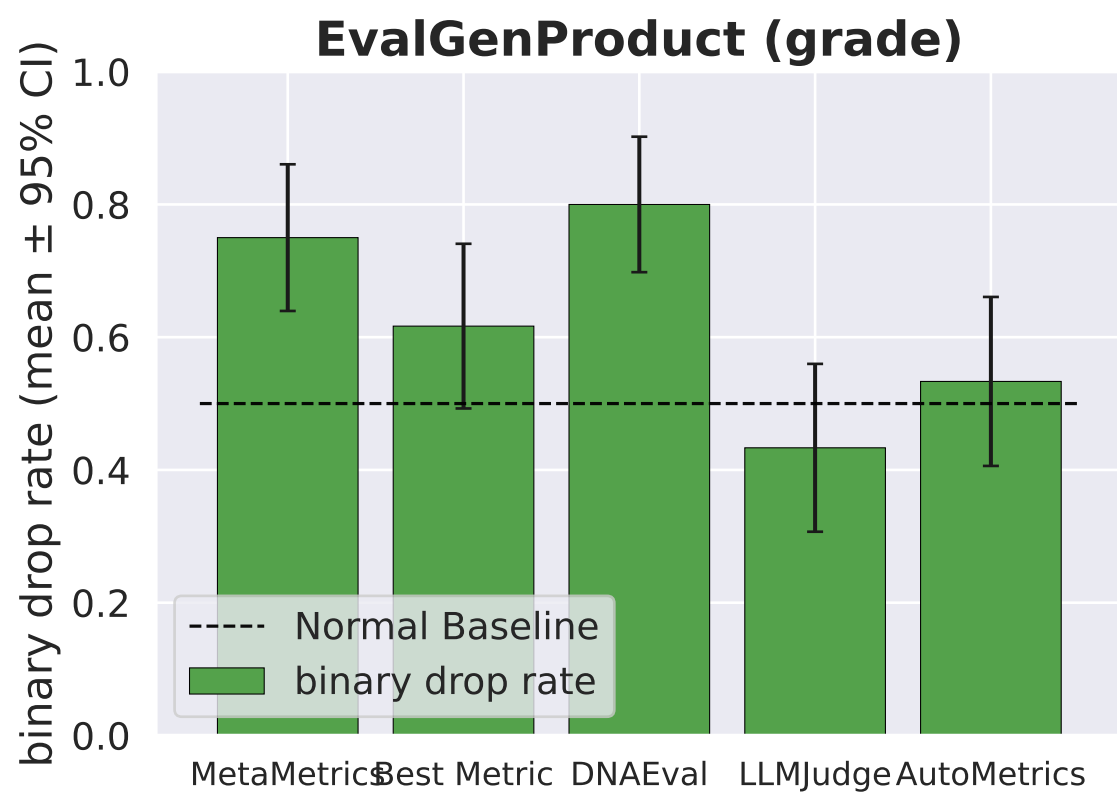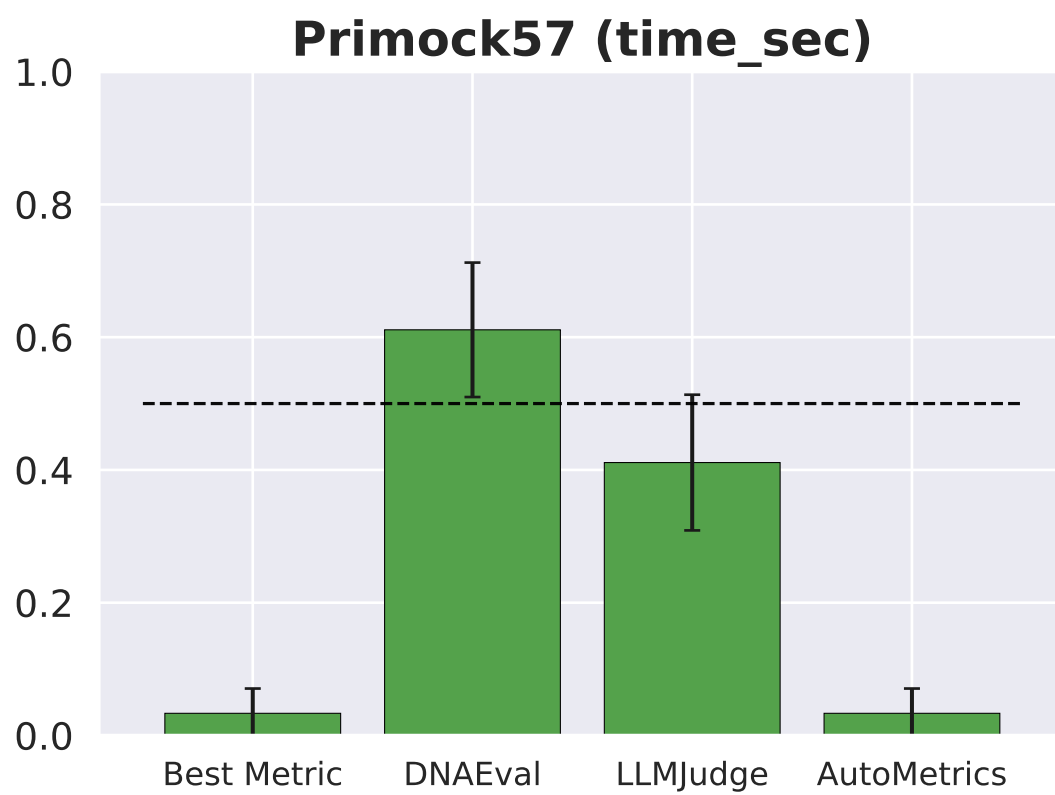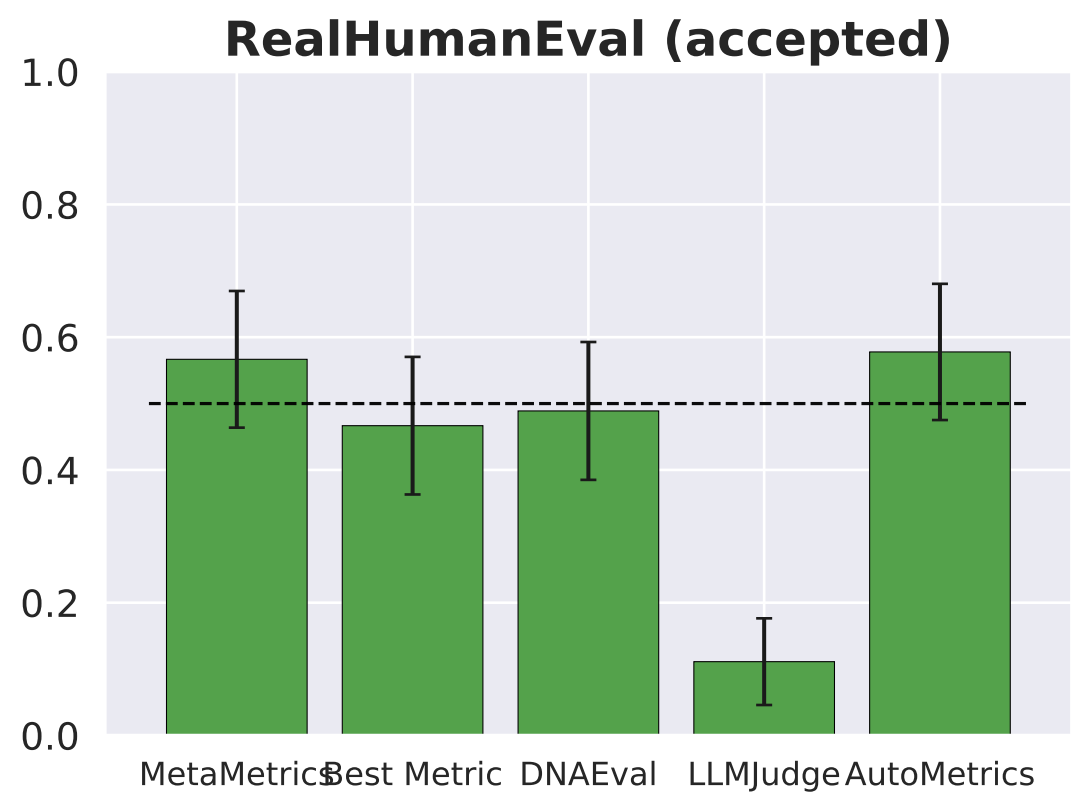

Supplement: supplementary_material [file binary_robustness_bars_other.pdf › iclr_autometrics/autometrics/analysis/robustness/outputs/binary_robustness_bars_other.pdf]

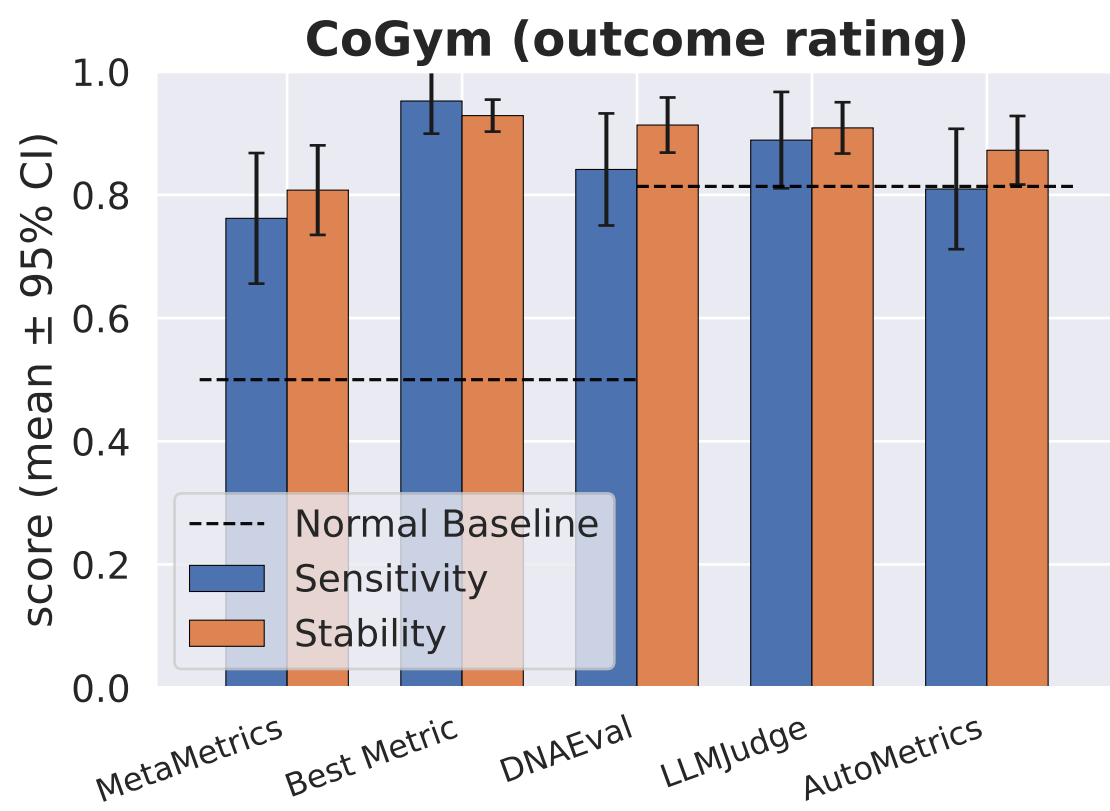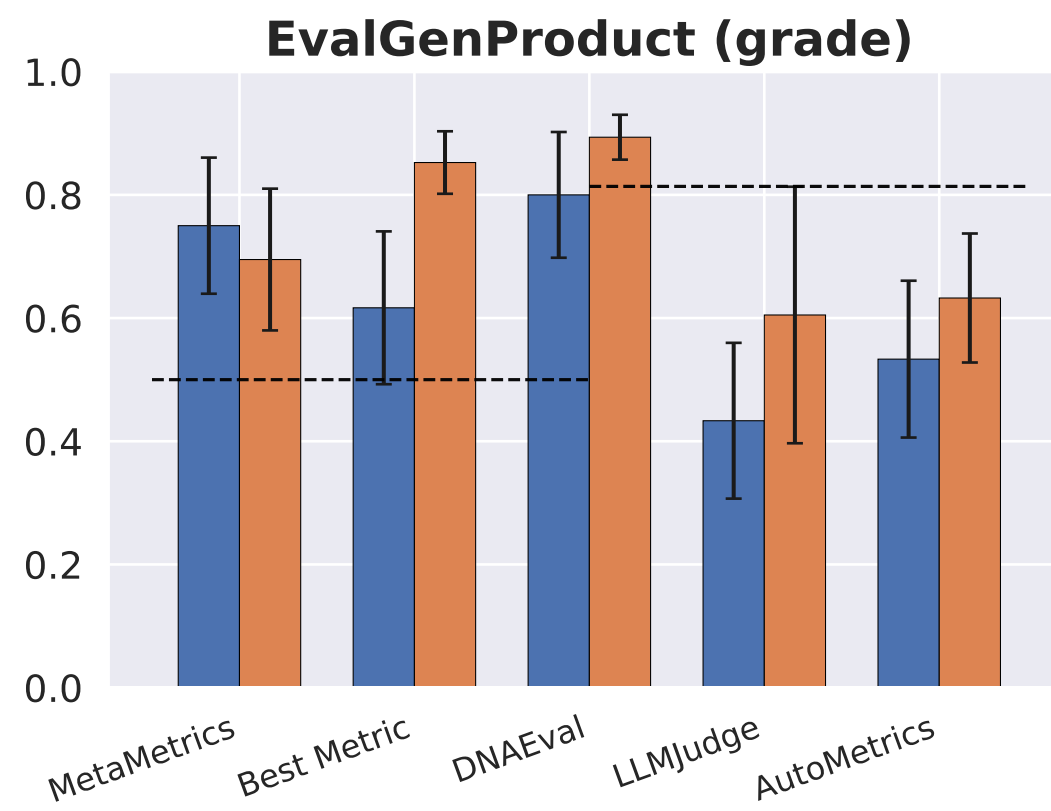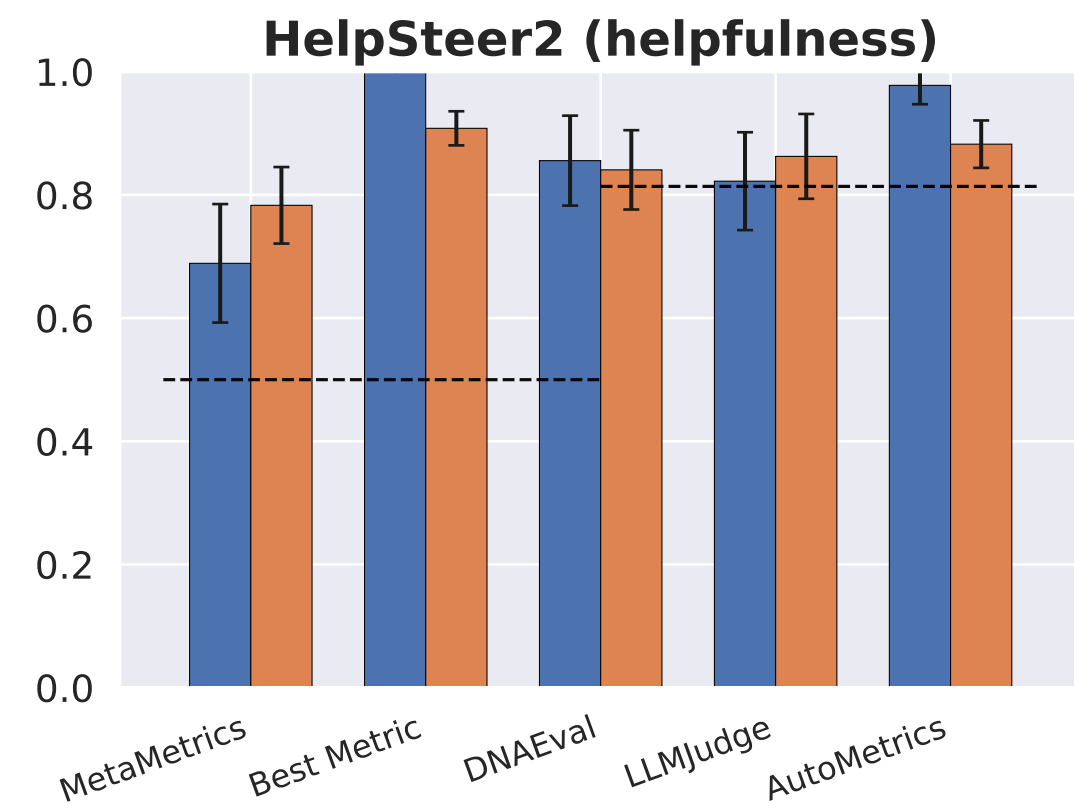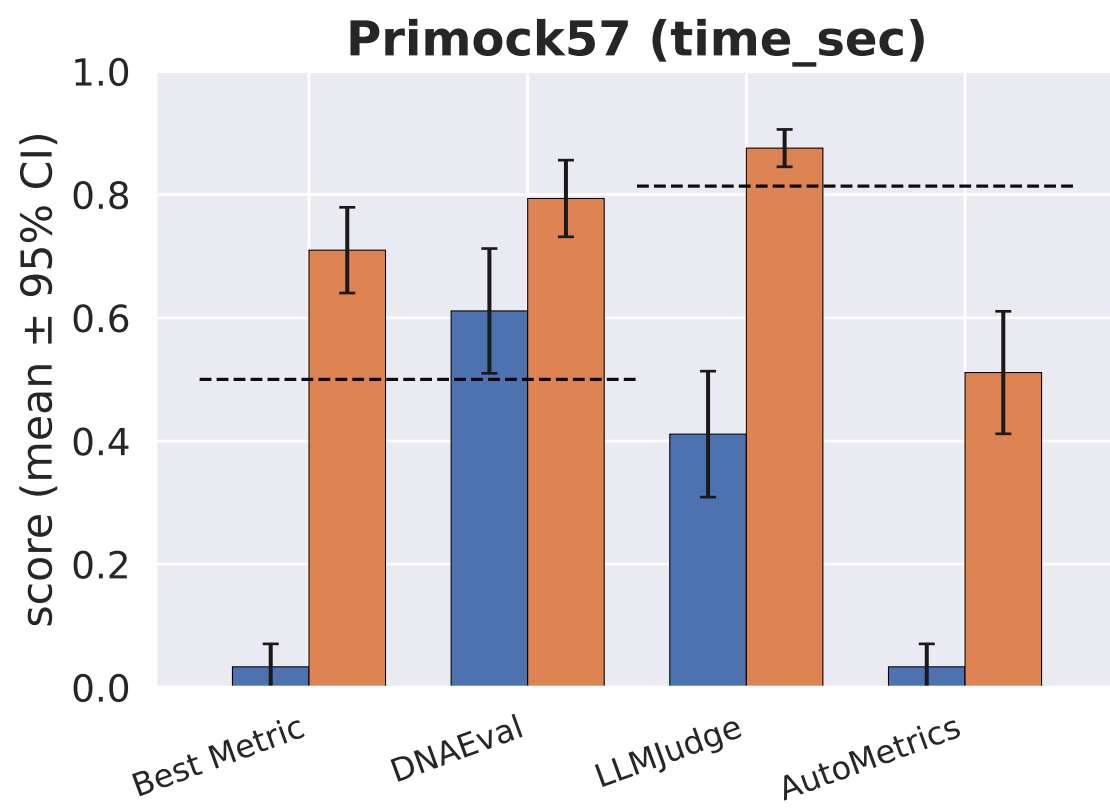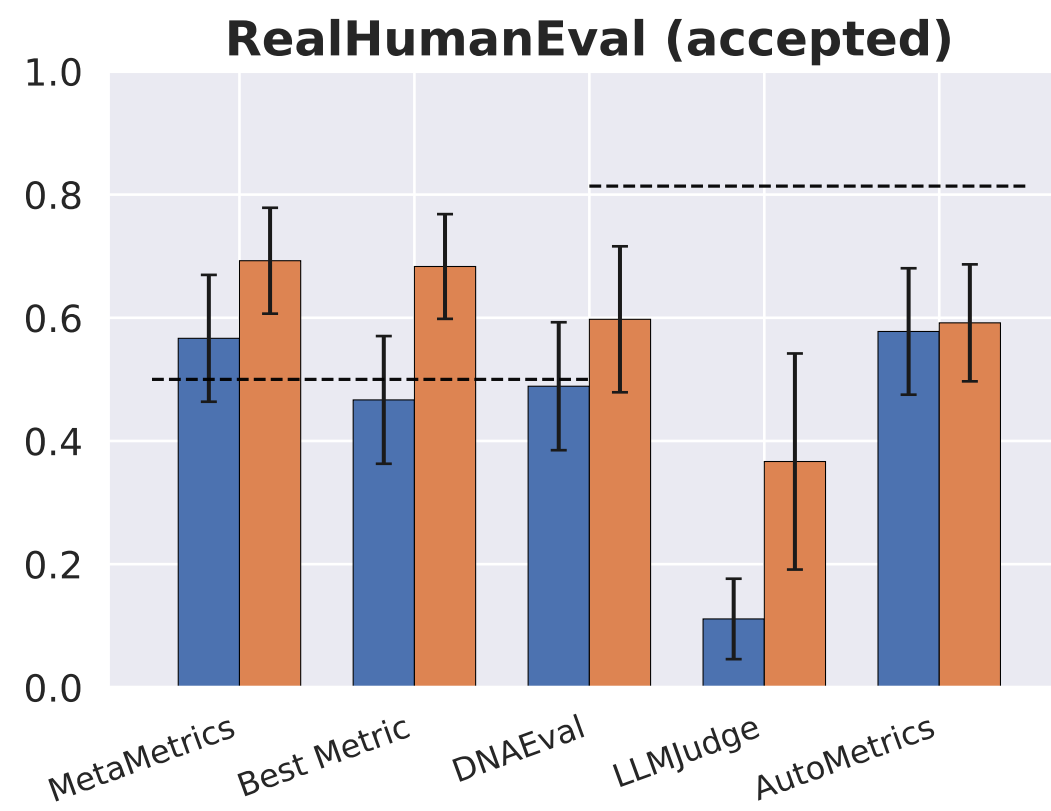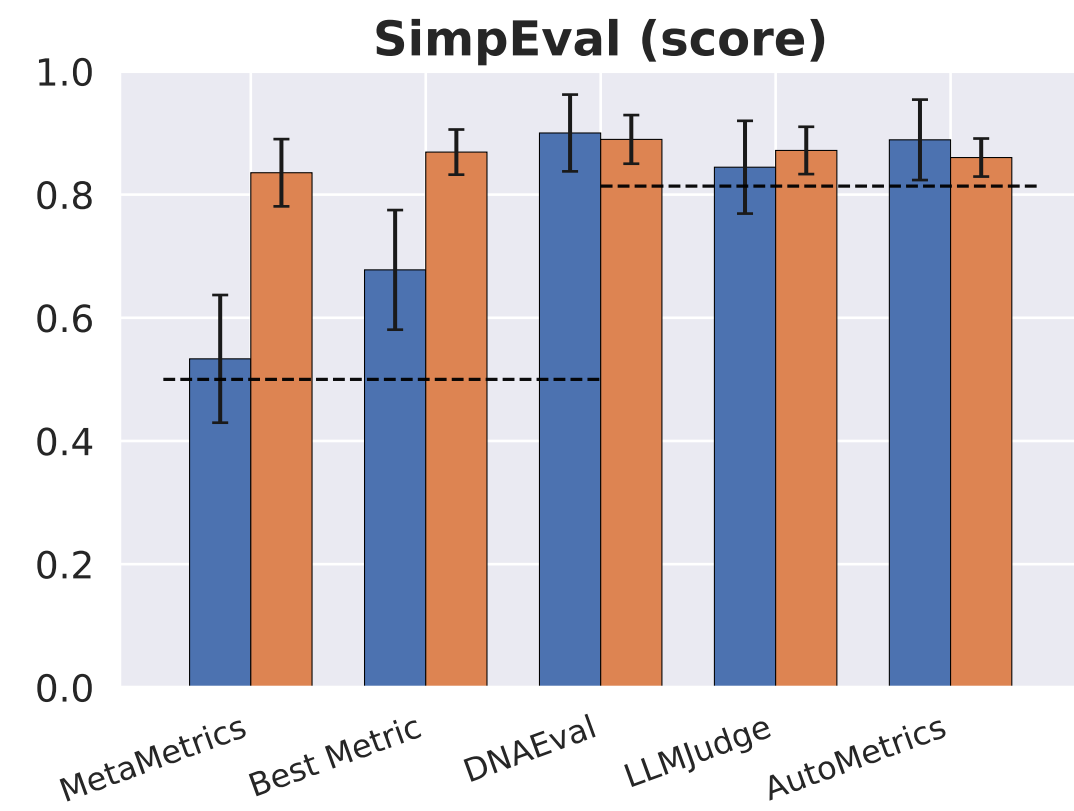

Supplement: supplementary_material [file robustness_bars_pair.pdf › iclr_autometrics/autometrics/analysis/robustness/outputs/robustness_bars_pair.pdf]

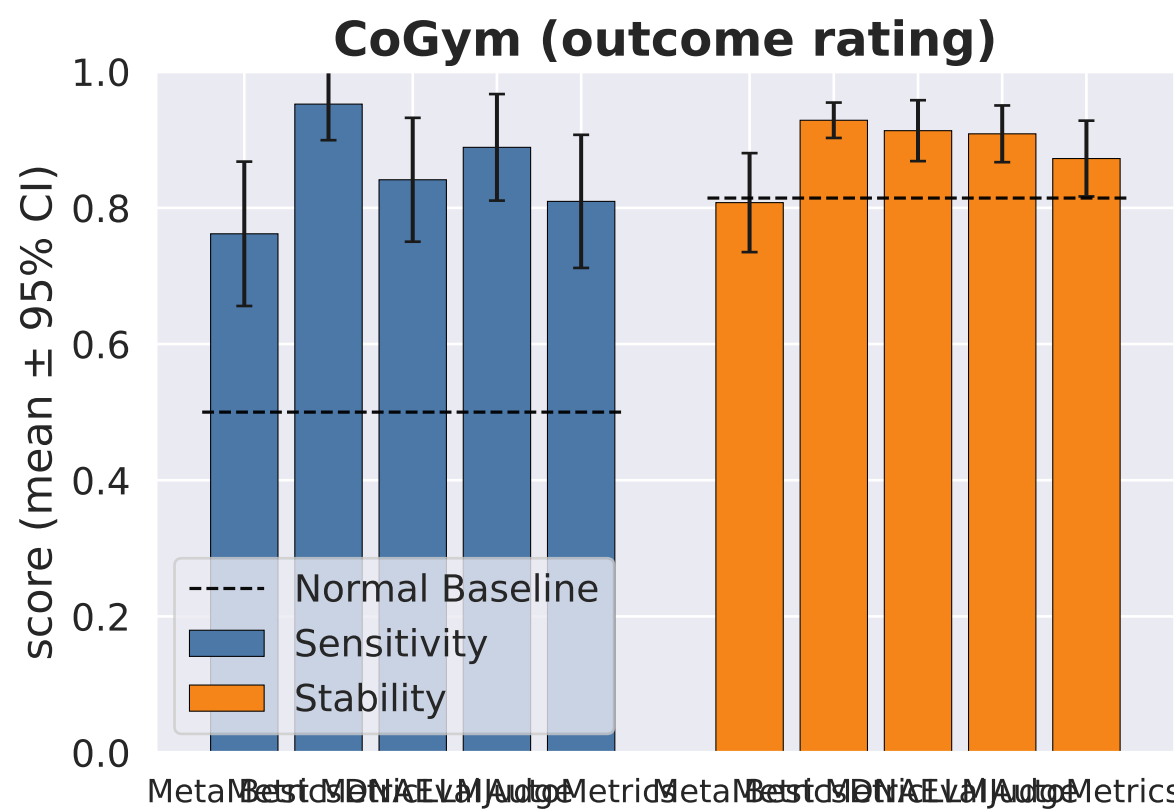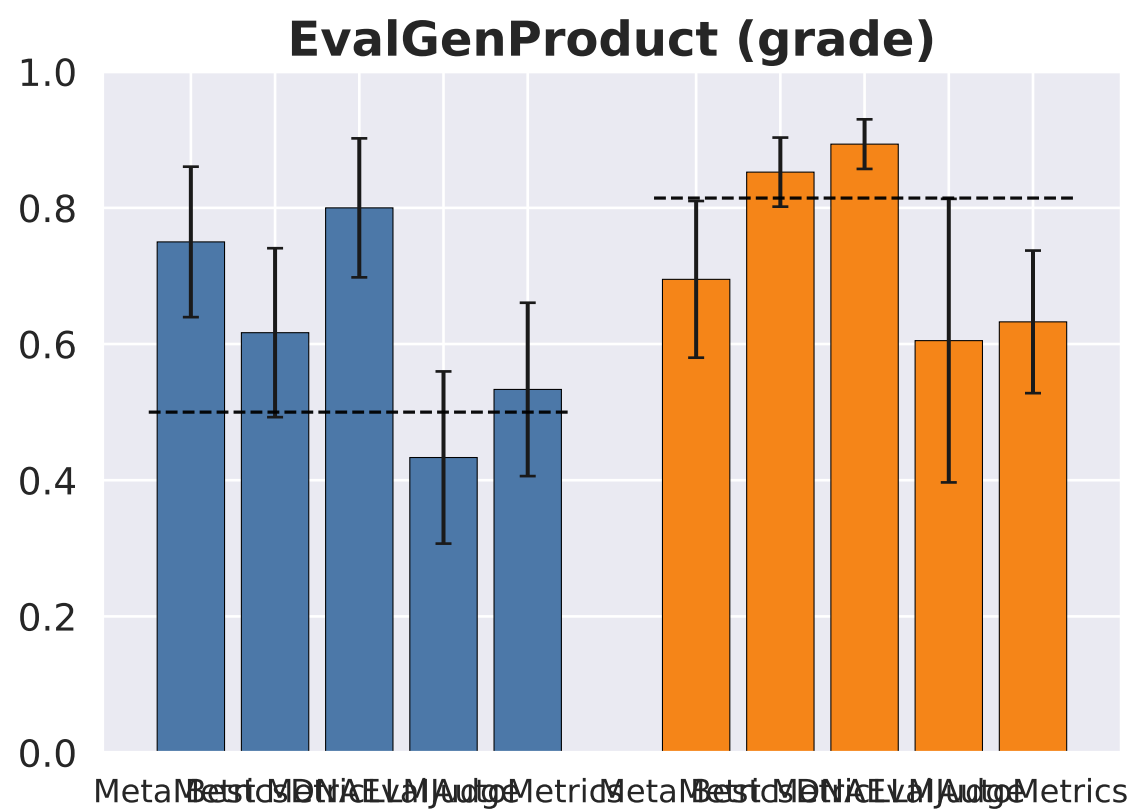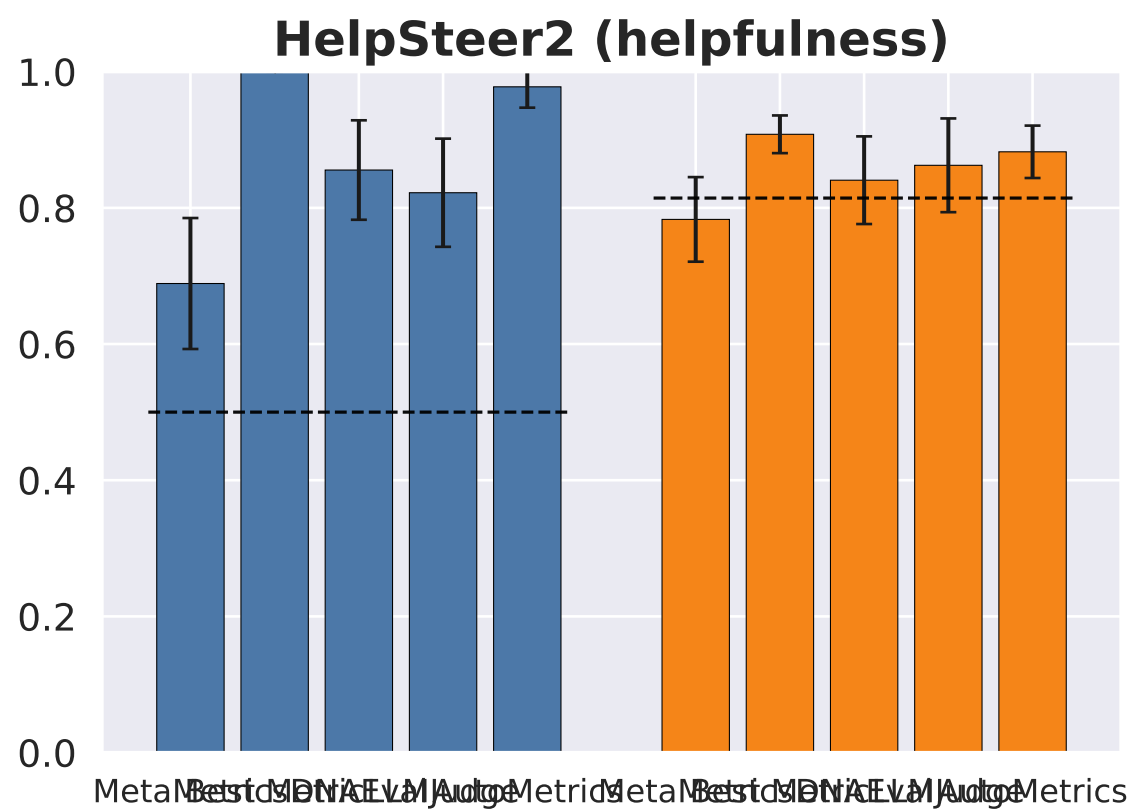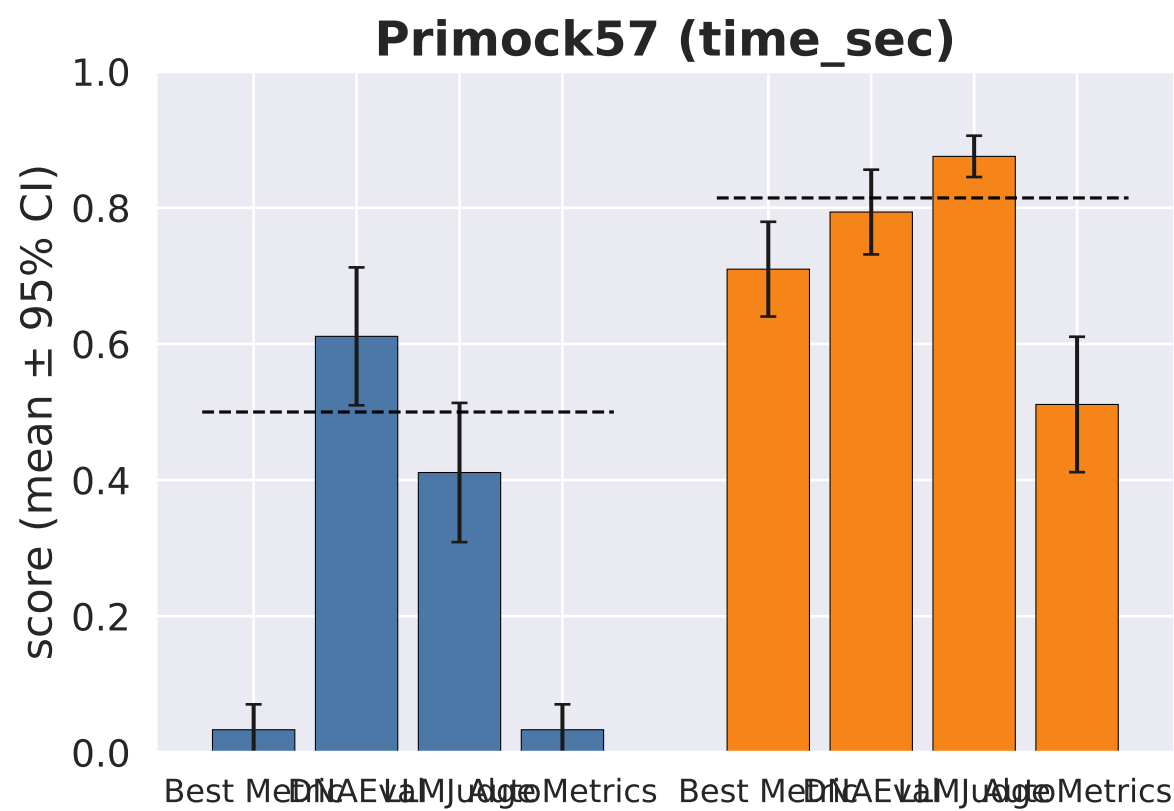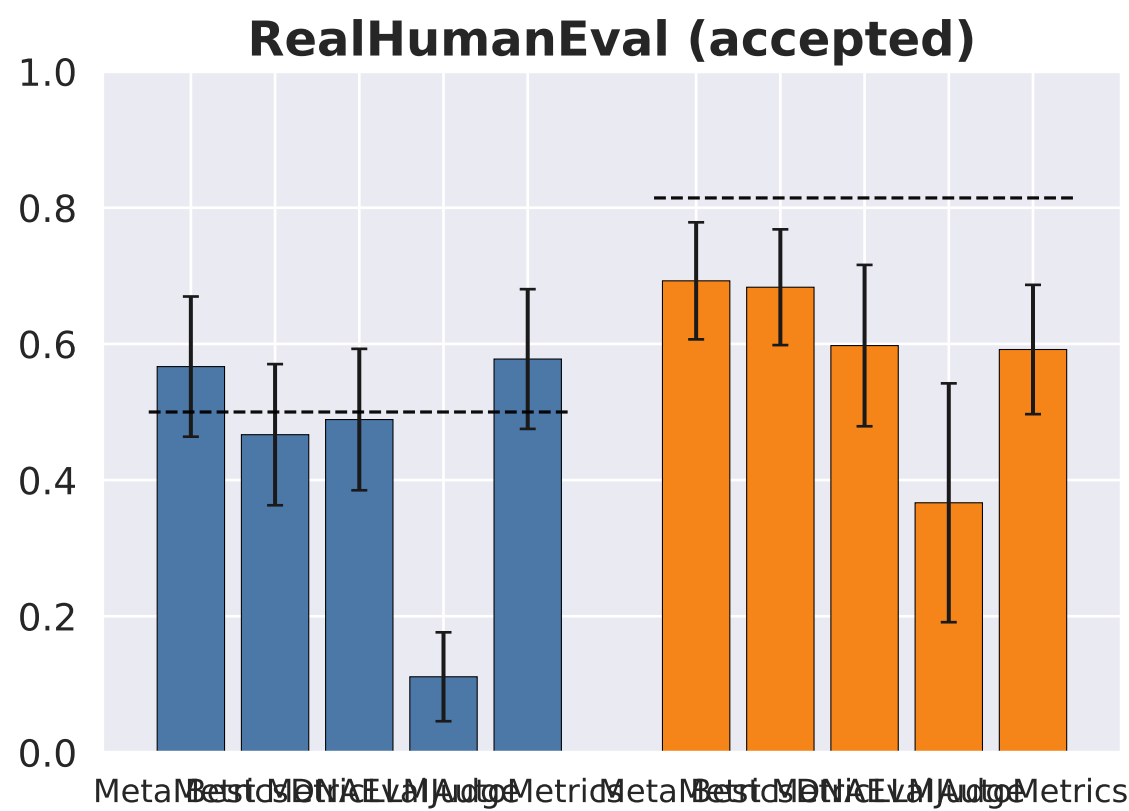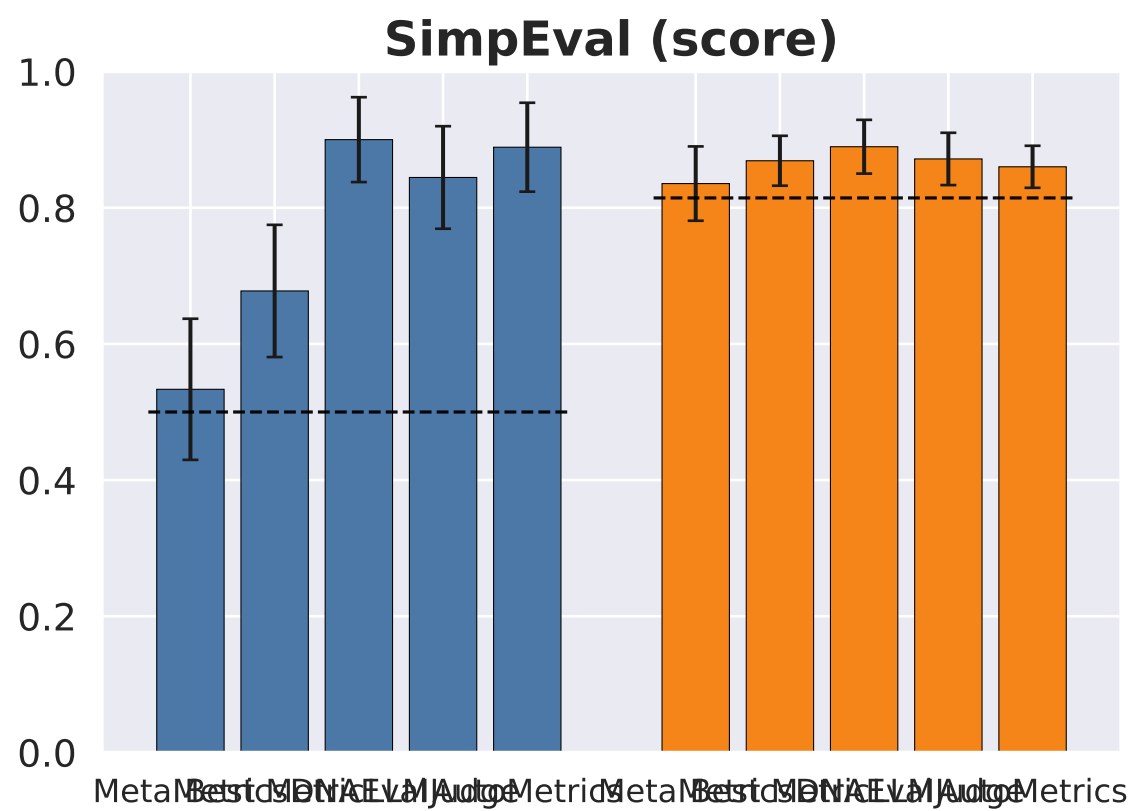

Supplement: supplementary_material [file robustness_bars_two_clusters.pdf › iclr_autometrics/autometrics/analysis/robustness/outputs/robustness_bars_two_clusters.pdf]

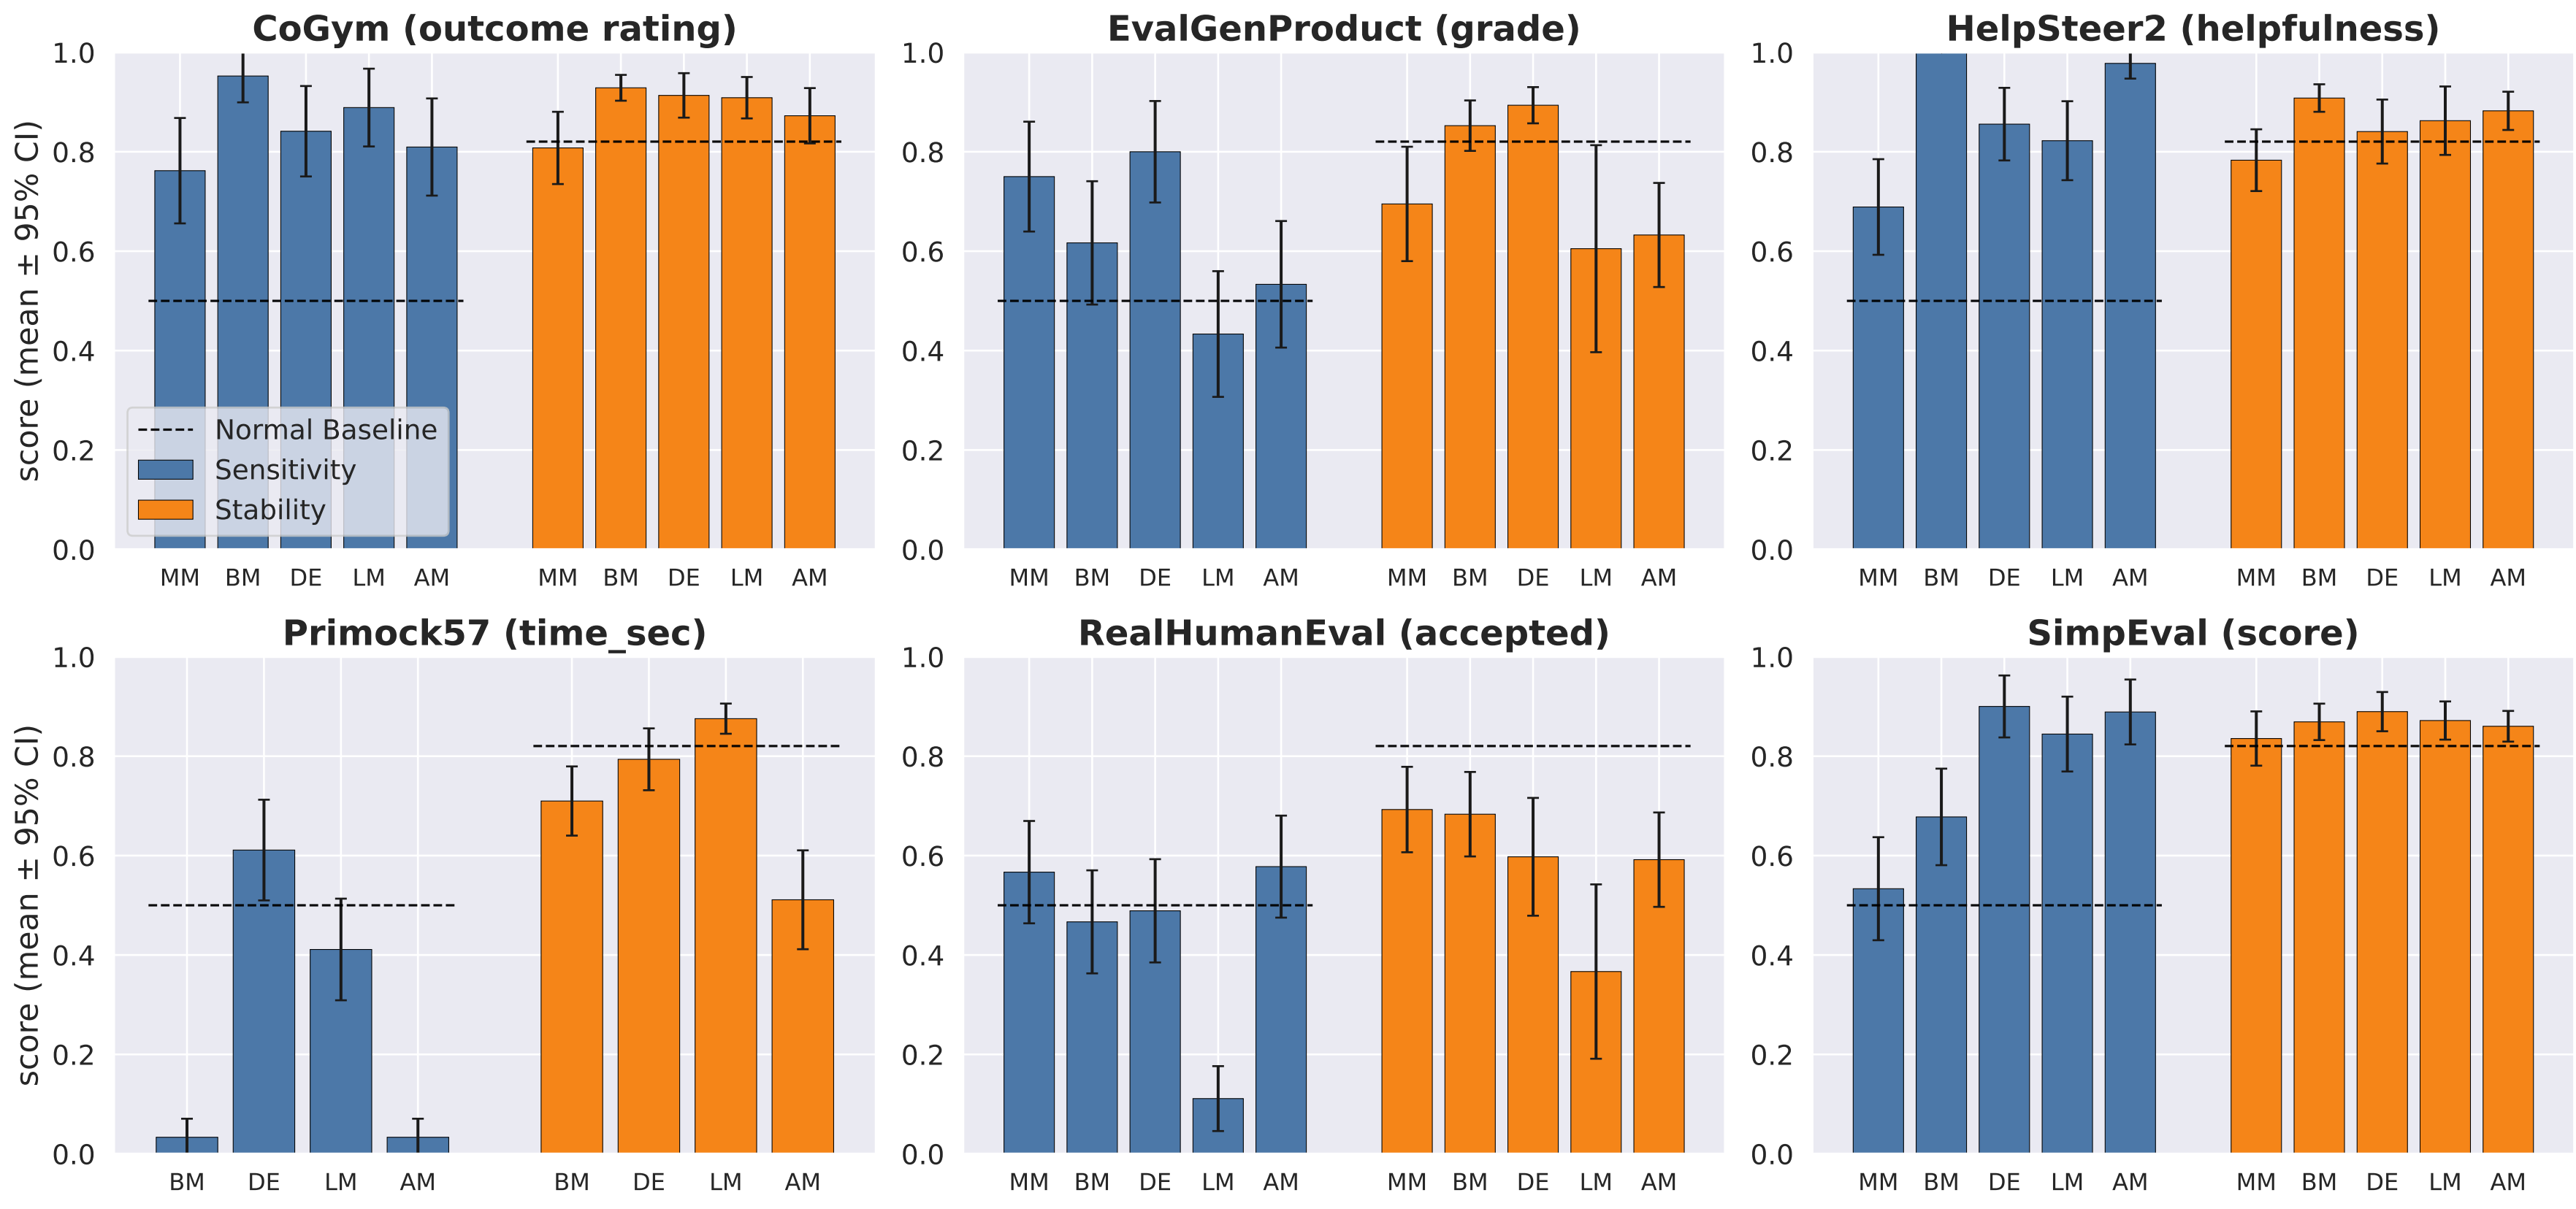

Supplement: supplementary_material [file robustness_bars_two_clusters_abbrev.pdf › iclr_autometrics/autometrics/analysis/robustness/outputs/robustness_bars_two_clusters_abbrev.pdf]

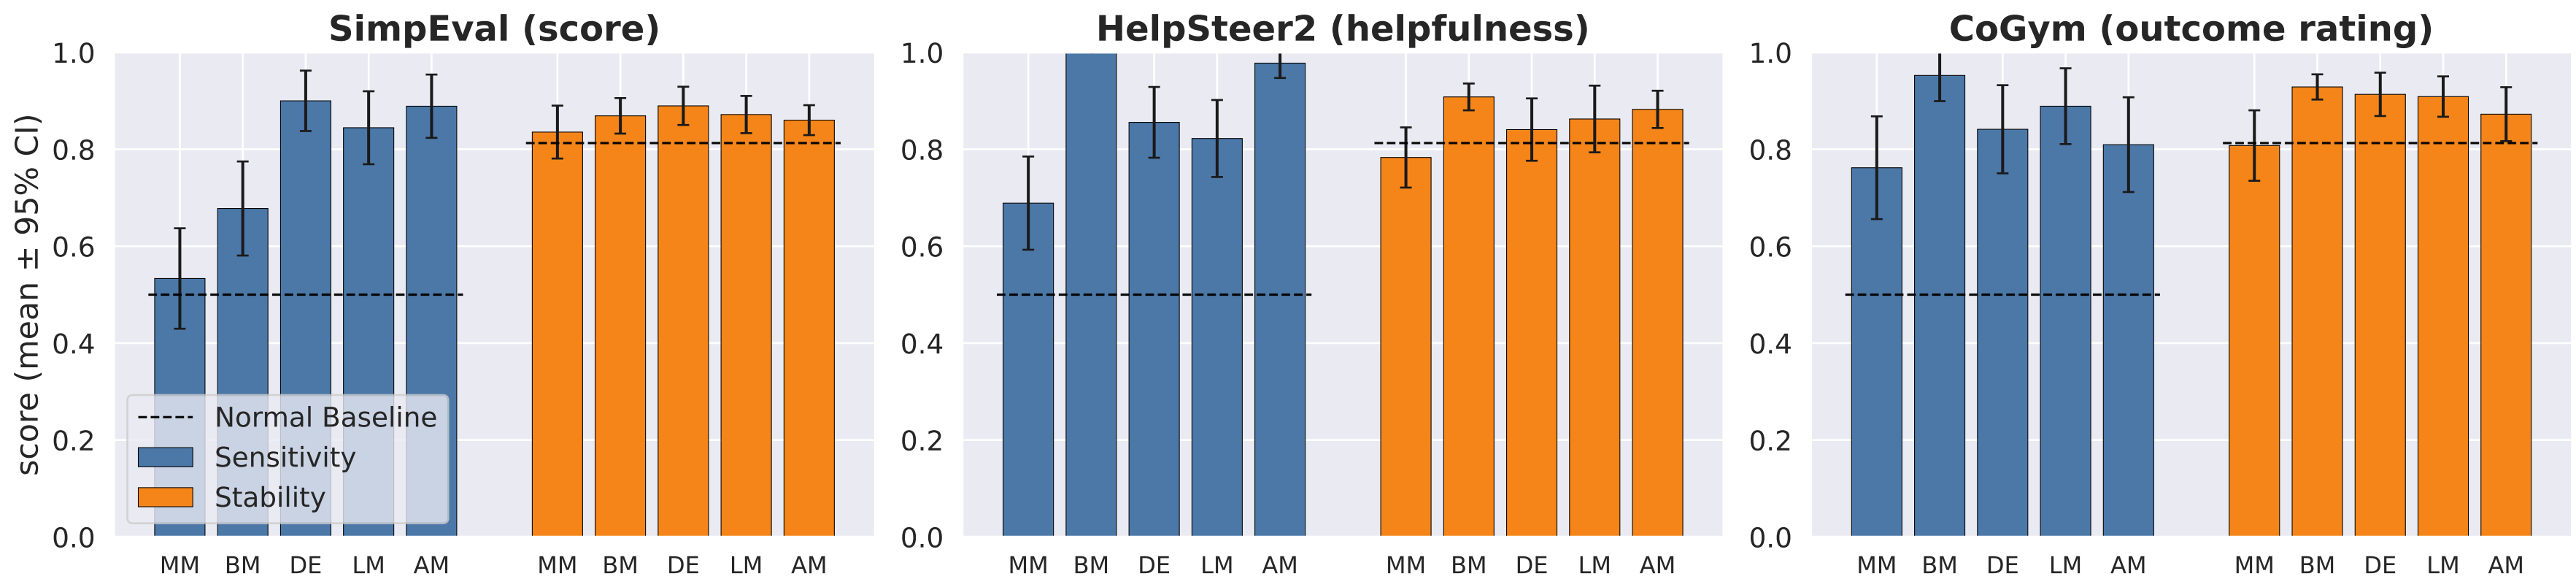

Supplement: supplementary_material [file robustness_bars_two_clusters_abbrev_core3.pdf › iclr_autometrics/autometrics/analysis/robustness/outputs/robustness_bars_two_clusters_abbrev_core3.pdf]

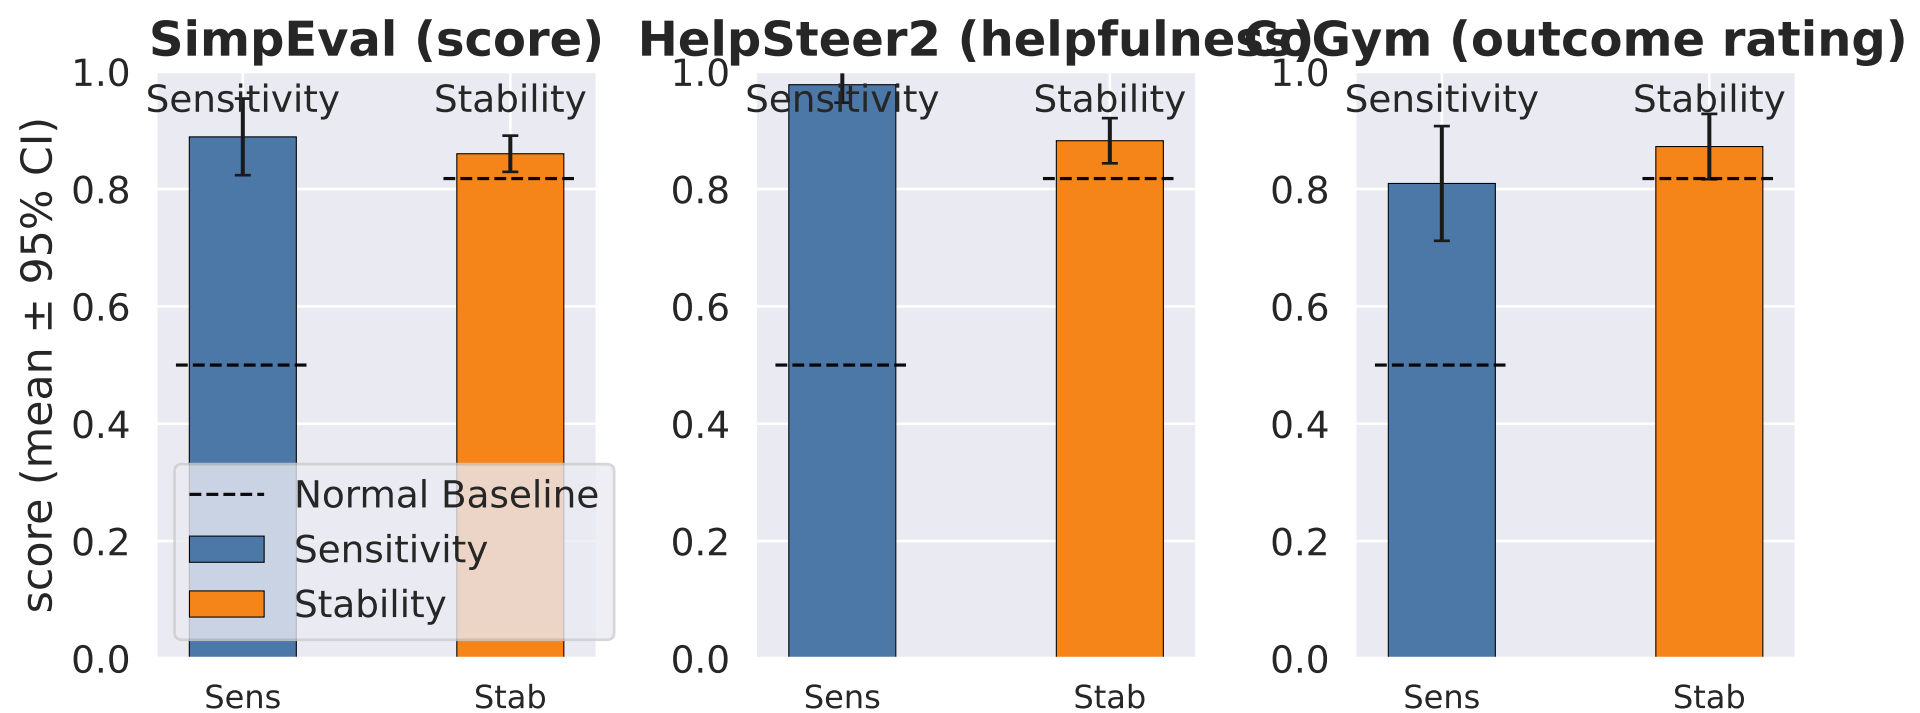

Supplement: supplementary_material [file robustness_bars_two_clusters_autometrics_only_core3.pdf › iclr_autometrics/autometrics/analysis/robustness/outputs/robustness_bars_two_clusters_autometrics_only_core3.pdf]

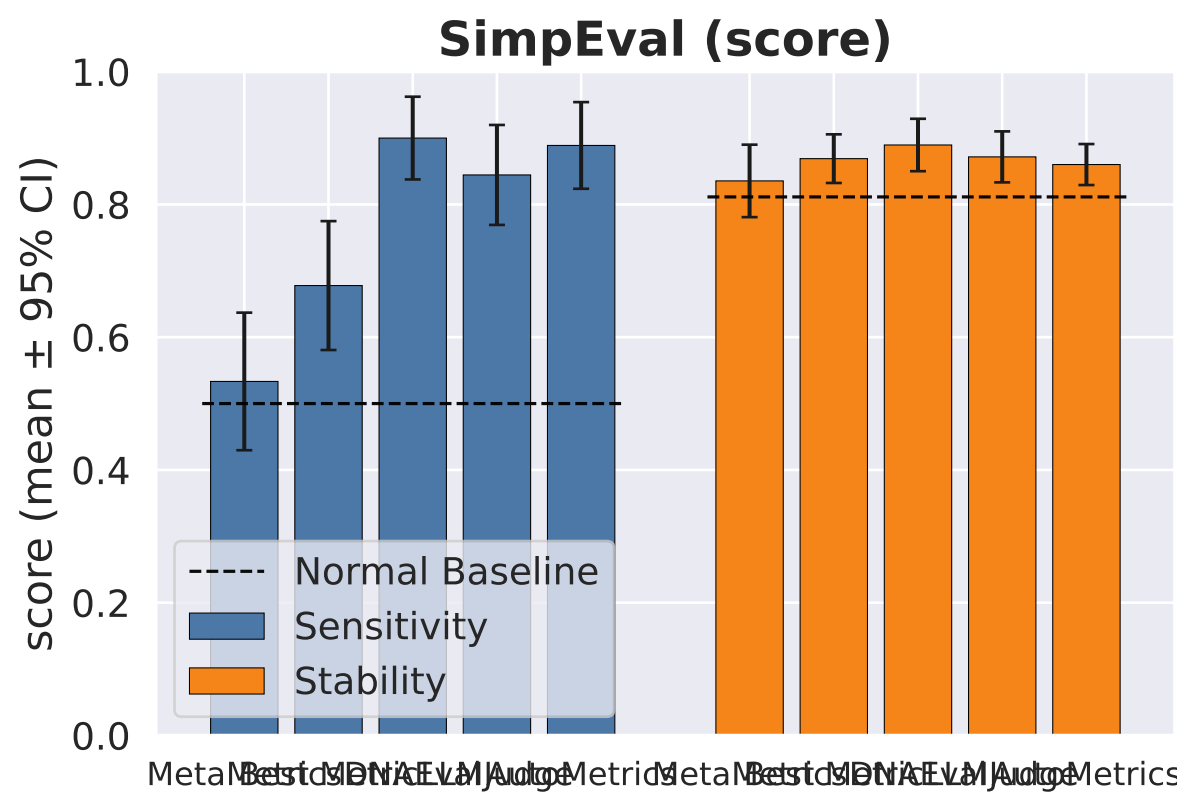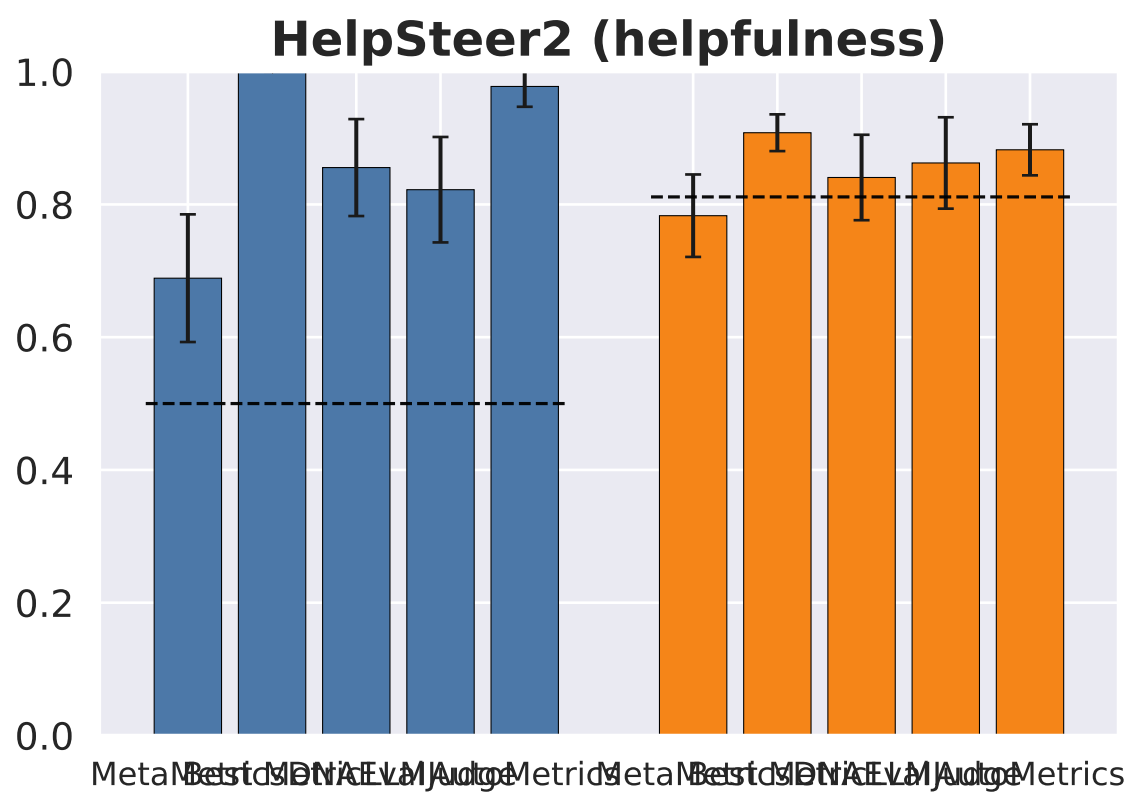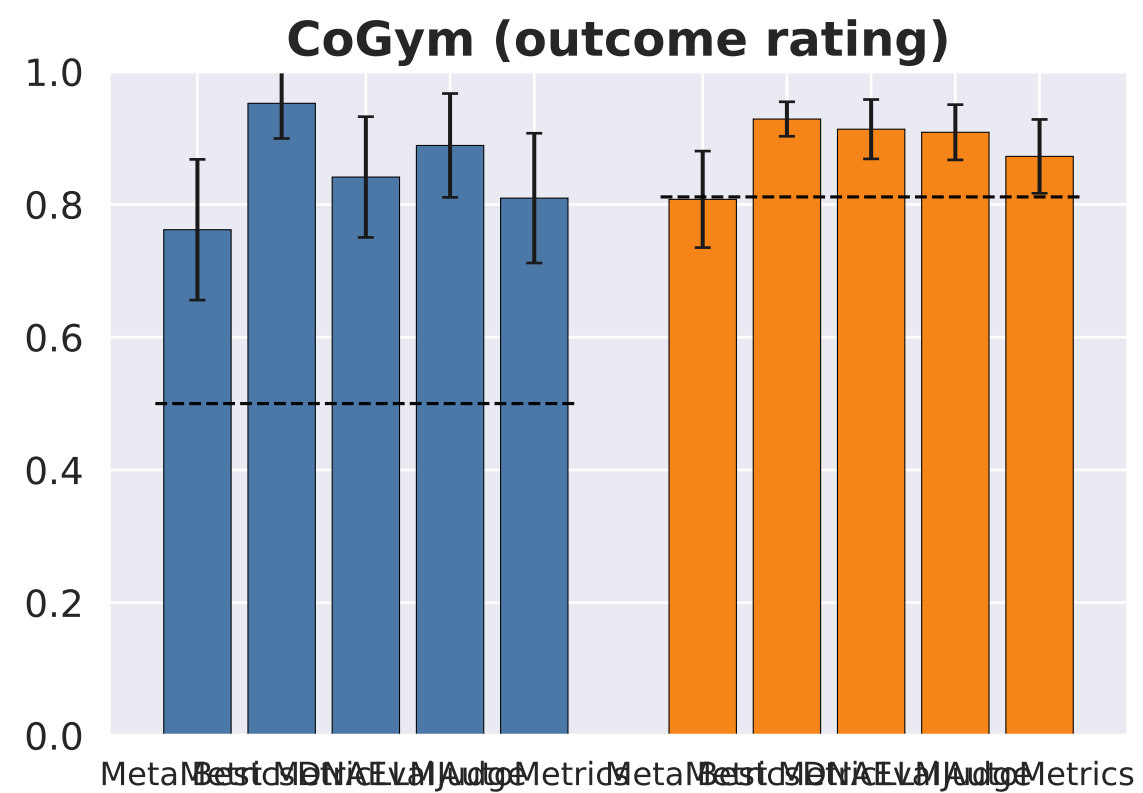

Supplement: supplementary_material [file robustness_bars_two_clusters_core3.pdf › iclr_autometrics/autometrics/analysis/robustness/outputs/robustness_bars_two_clusters_core3.pdf]

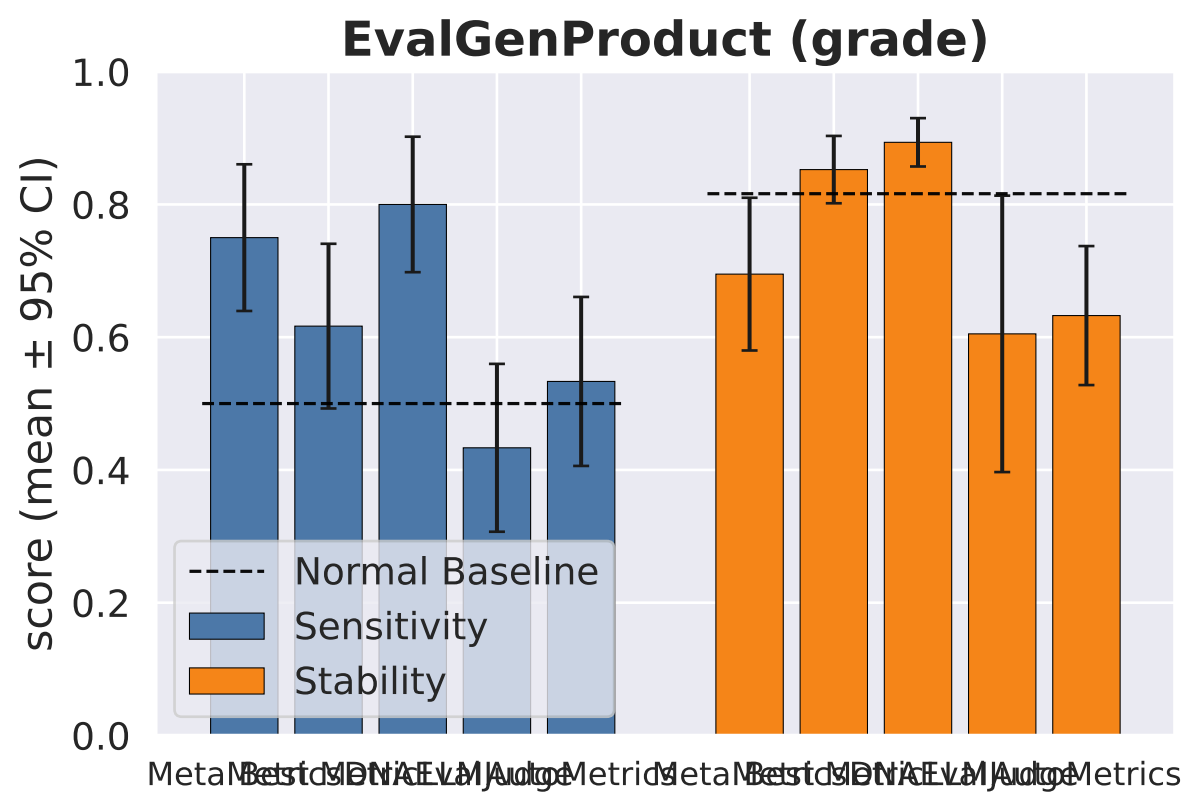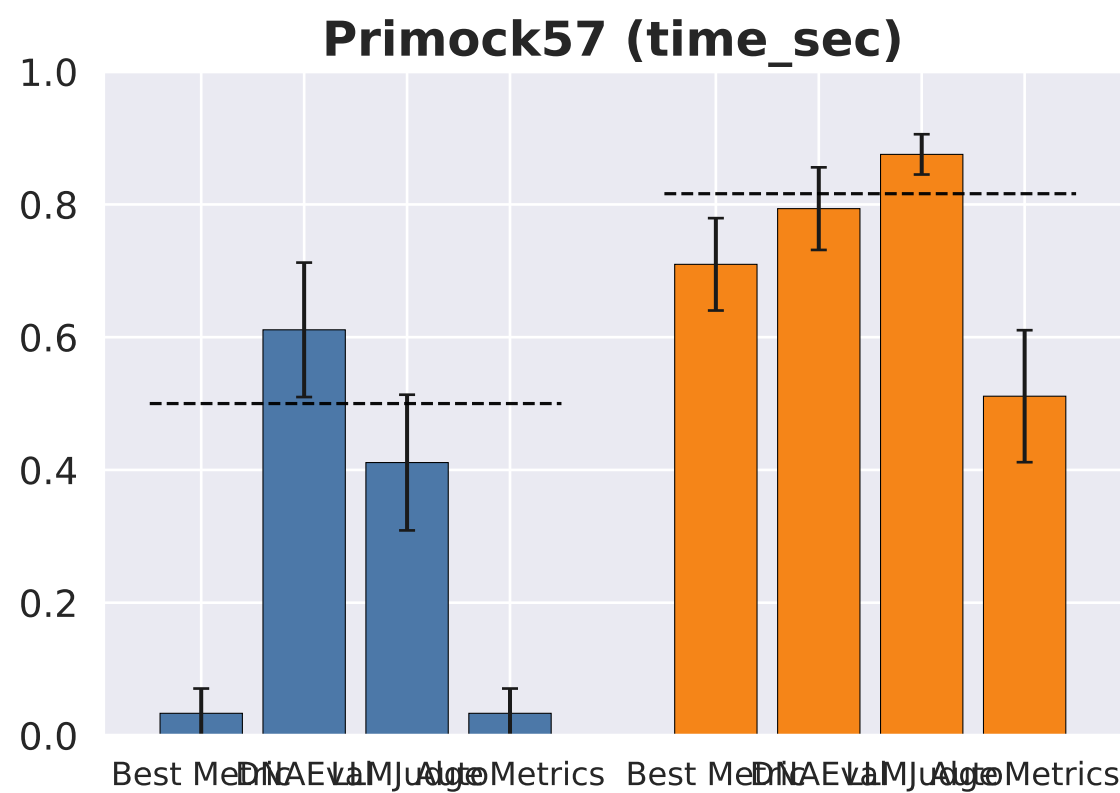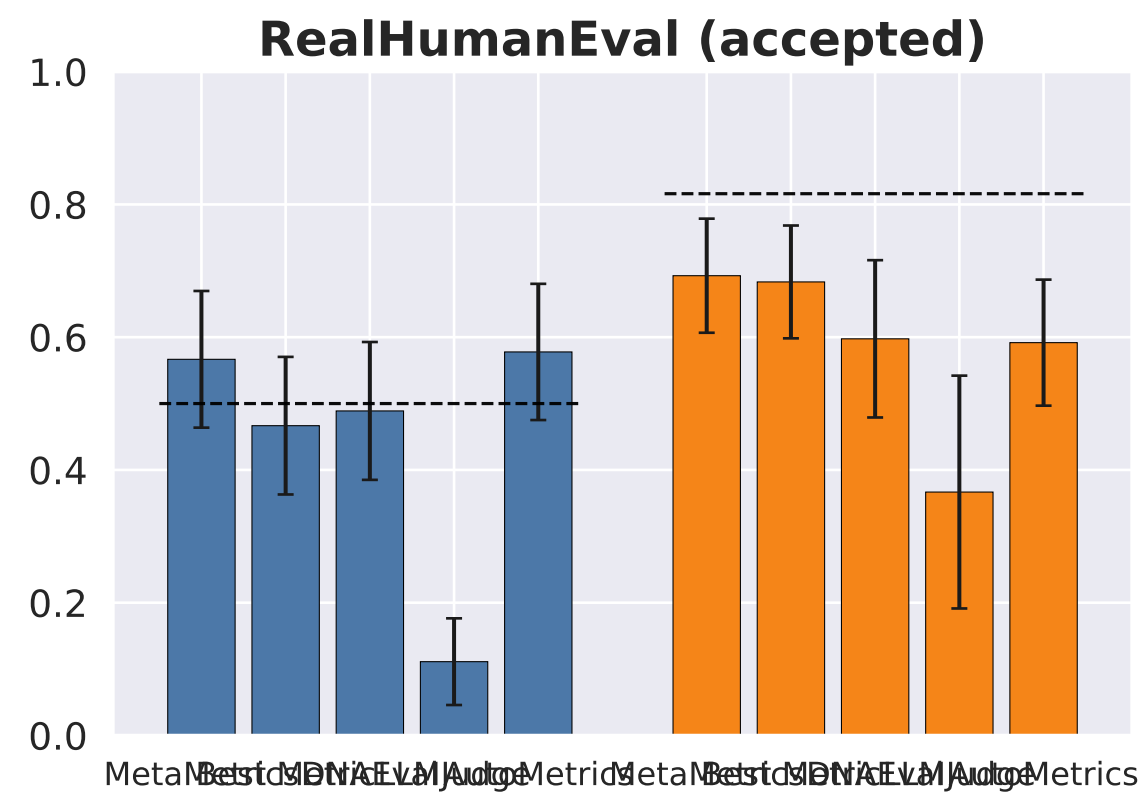

Supplement: supplementary_material [file robustness_bars_two_clusters_other.pdf › iclr_autometrics/autometrics/analysis/robustness/outputs/robustness_bars_two_clusters_other.pdf]

## Top Metrics by Type

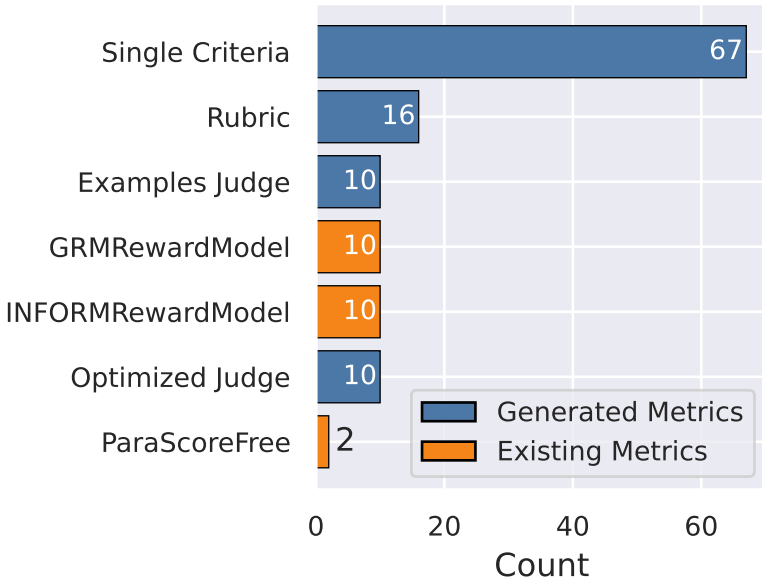

Supplement: supplementary_material [file top_metrics_tally_by_type_barh.pdf › iclr_autometrics/autometrics/analysis/stats/outputs/top_metrics_tally_by_type_barh.pdf]

Average Ratings by User

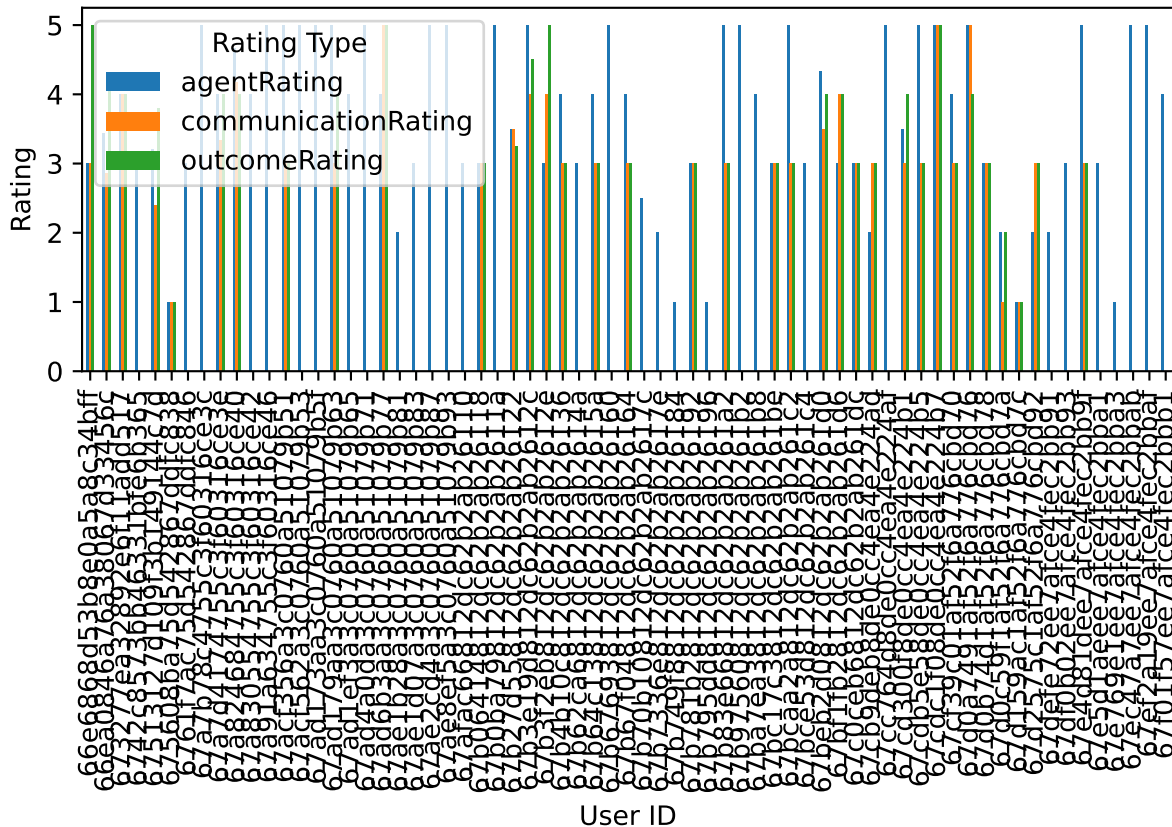

Supplement: supplementary_material [file avg_ratings_by_user.pdf › iclr_autometrics/autometrics/autometrics/dataset/datasets/cogym/analysis/avg_ratings_by_user.pdf]

Rows per Task Type

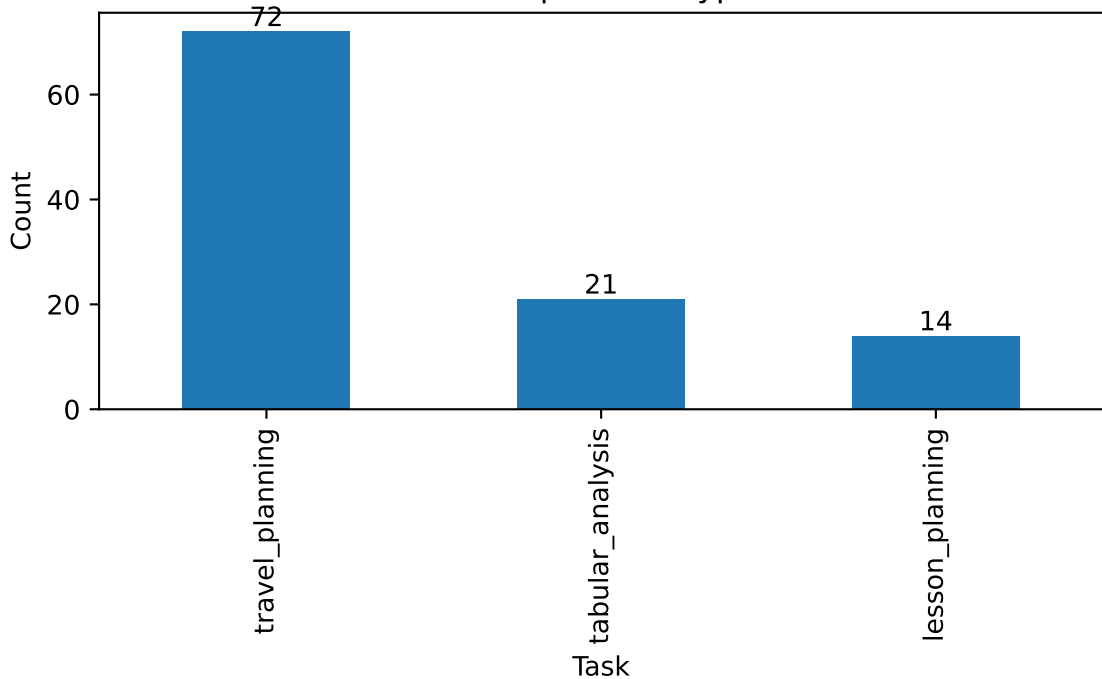

Supplement: supplementary_material [file rows_per_task_bar.pdf › iclr_autometrics/autometrics/autometrics/dataset/datasets/cogym/analysis/rows_per_task_bar.pdf]

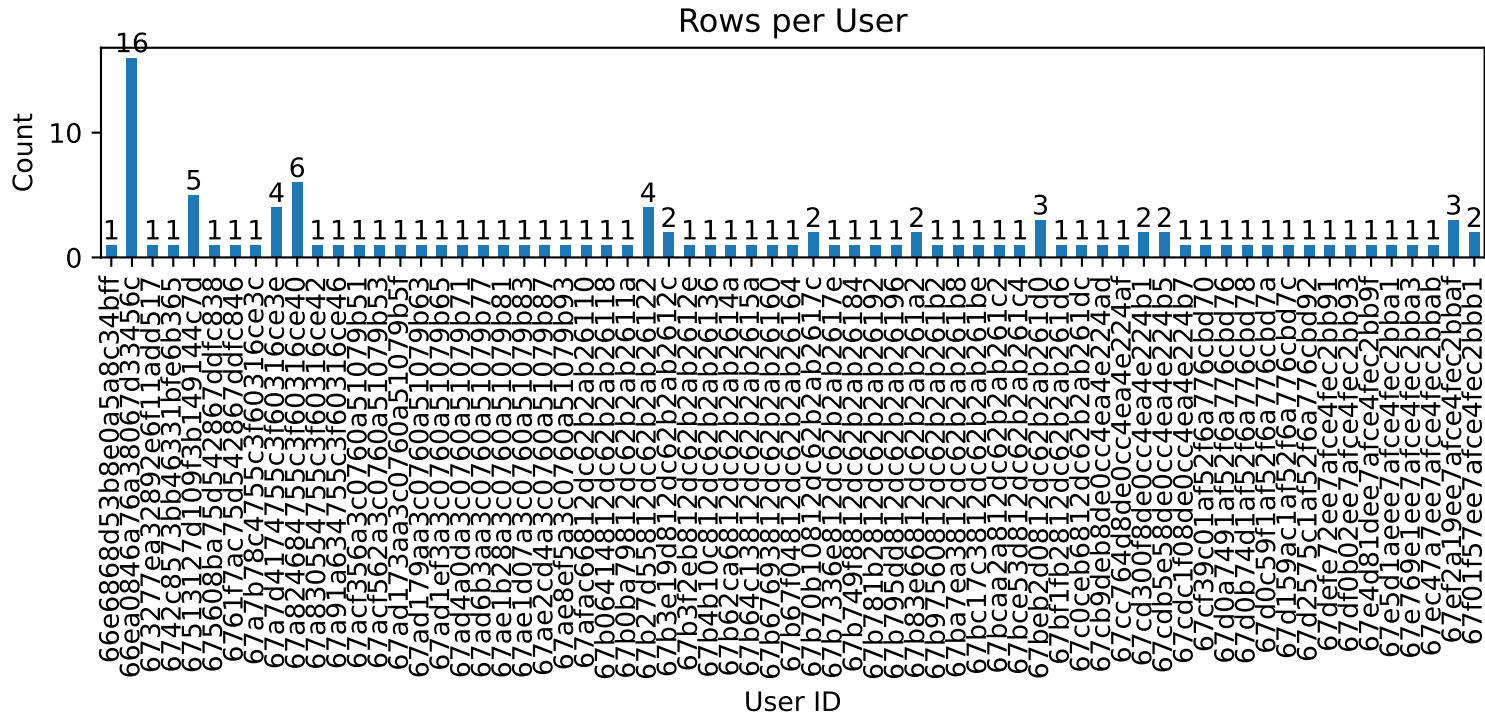

Supplement: supplementary_material [file rows_per_user_bar.pdf › iclr_autometrics/autometrics/autometrics/dataset/datasets/cogym/analysis/rows_per_user_bar.pdf]

Histogram of Rows per User

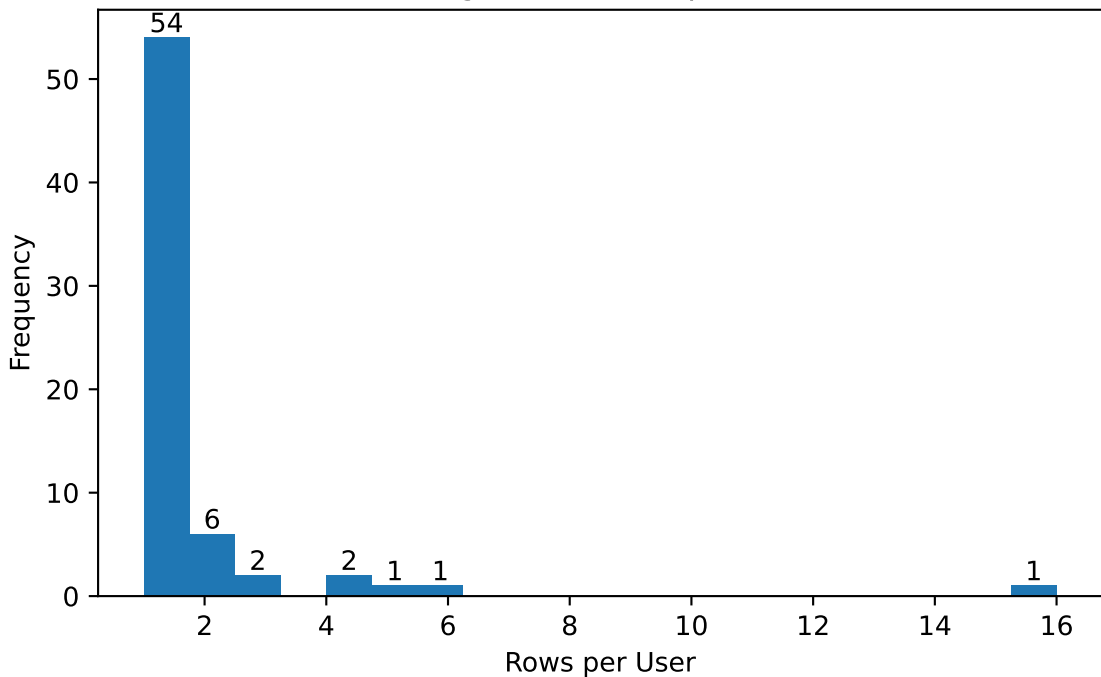

Supplement: supplementary_material [file rows_per_user_hist.pdf › iclr_autometrics/autometrics/autometrics/dataset/datasets/cogym/analysis/rows_per_user_hist.pdf]
